# Harmonization of diffusion MRI datasets with adaptive dictionary learning

Samuel St-Jean\*, Max A. Viergever, Alexander Leemans

*Image Sciences Institute, University Medical Center Utrecht, Heidelberglaan 100, 3584 CX Utrecht, the Netherlands*

---

## Abstract

Diffusion magnetic resonance imaging is a noninvasive imaging technique which can indirectly infer the microstructure of tissues and provide metrics which are subject to normal variability across subjects. Potentially abnormal values or features may yield essential information to support analysis of controls and patients cohorts, but subtle confounds affecting diffusion MRI, such as those due to difference in scanning protocols or hardware, can lead to systematic errors which could be mistaken for purely biologically driven variations amongst subjects. In this work, we propose a new harmonization algorithm based on adaptive dictionary learning to mitigate the unwanted variability caused by different scanner hardware while preserving the natural biological variability present in the data. Overcomplete dictionaries, which are learned automatically from the data and do not require paired samples, are then used to reconstruct the data from a different scanner, removing variability present in the source scanner in the process. We use the publicly available database from an international challenge to evaluate the method, which was acquired on three different scanners and with two different protocols, and propose a new mapping towards a scanner-agnostic space. Results show that the effect size of the four studied diffusion metrics is preserved while removing variability attributable to the scanner. Experiments with alterations using a free water compartment, which is not simulated in the training data, shows that the effect size induced by the alterations is also preserved after harmonization. The algorithm is freely available and could help multicenter studies in pooling their data, while removing scanner specific confounds, and increase statistical power in the process.

*Keywords:* Diffusion MRI, Harmonization, Scanner variability, Dictionary learning, Cross-validation, Akaike information criterion

---

## 1. Introduction

Diffusion magnetic resonance imaging (dMRI) is a noninvasive imaging technique which can indirectly infer the microstructure of tissues based on the displacement of water molecules. As dMRI only offers an indirect way to study, e.g., the brain microstructure, analysis of dMRI datasets includes multiple processing steps to ensure adequate correction of acquisition artifacts due to subject motion or eddy current induced distortions, amongst others (Tournier et al., 2011). Quantitative scalar measures of diffusion can be extracted from the acquired datasets, such as the apparent diffusion coefficient (ADC) or fractional anisotropy (FA) as computed from diffusion tensor imaging (DTI) (Basser et al., 1994; Basser and Pierpaoli, 1996), with a plethora of other measures and diffusion models nowadays available (Assemlal et al., 2011; Tournier, 2019). These measures are subject to normal variability across subjects and potentially abnormal values or features extracted from dMRI datasets may yield essential information to support analysis of controls and patients cohorts (Johansen-Berg and Behrens, 2009; Jones, 2011).

As small changes in the measured signal are ubiquitous due to differences in scanner hardware (Sakaie et al., 2018), software versions of the scanner or processing tools (Gronenschild et al., 2012; Sakaie et al.,

---

\*Corresponding author

*Email addresses:* [samuel1@isi.uu.nl](mailto:samuel1@isi.uu.nl) (Samuel St-Jean), [max@isi.uu.nl](mailto:max@isi.uu.nl) (Max A. Viergever), [A.Leemans@umcutrecht.nl](mailto:A.Leemans@umcutrecht.nl) (Alexander Leemans)

2018), field strength of the magnet (Huisman et al., 2006) or reconstruction methods in parallel MRI and accelerated imaging (Dietrich et al., 2008; St-Jean et al., 2018), non negligible effects may translate into small differences in the subsequently computed diffusion metrics. Subtle confounds affecting dMRI can even be due to measuring at different time points in the cardiac cycle, leading to changes in the measured values of pseudo-diffusion over the cardiac cycle (De Luca et al., 2019; Federau et al., 2013). In the presence of disease, these small variations in the measured signal are entangled in the genuine biological variability which is usually the main criterion of interest to discover or analyze subsequently. This can lead to confounding effects and systematic errors which could be mistaken for purely biologically driven variations amongst subjects. To mitigate these issues, large scale studies try to harmonize their acquisition protocols across centers to further reduce these potential sources of variability (Duchesne et al., 2019) or may only use a single scanner without upgrading it for long term studies (Hofman et al., 2015, 1991). The stability brought by keeping the same scanning hardware is however at the cost of potentially missing on improved, more efficient sequences or faster scanning methods becoming common in MRI (Feinberg et al., 2010; Larkman et al., 2001; Lustig et al., 2007). Even by carefully controlling all these sources of variability as much as possible, there still remain reproducibility issues between scanners of the same model or in scan-rescan studies of dMRI metrics (Kristo et al., 2013; Magnotta et al., 2012; Vollmar et al., 2010). Over the years, many algorithms have been developed to mitigate the variability attributed to non-biological effects in dMRI, e.g., in order to combine datasets from multiple studies and increase statistical power, see e.g., (Tax et al., 2019; Zhu et al., 2019) for reviews. Common approaches consist in harmonizing the raw dMRI datasets themselves (Cetin Karayumak et al., 2019; Mirzaalian et al., 2016) or the computed scalar metrics (Fortin et al., 2017; Pohl et al., 2016) to reduce variability between scanners. Recently, a dMRI benchmark database containing ten training subjects and four test subjects datasets acquired on three scanners with two acquisition protocols was presented at the computational diffusion MRI (CDMRI) 2017 challenge (Tax et al., 2019). The publicly available CDMRI database was previously used to compare five harmonization algorithms, including a previous version of the algorithm we present here, which we use for evaluation.

In this work, we propose a new algorithm based on adaptive dictionary learning to mitigate the unwanted variability caused by different scanner hardware while preserving the natural biological variability present in the data. Expanding upon the methodology presented in St-Jean et al. (2016, 2017), overcomplete dictionaries are learned automatically from the data for a given target scanner with an automatic tuning of the regularization parameter. These dictionaries are then used to reconstruct the data from a different source scanner, removing variability present in the source scanner in the process. Mapping across different spatial resolutions can be obtained by adequate subsampling of the dictionary. Additional experiments beyond the original challenge show that the harmonization algorithm preserves alterations made on the test subjects while removing scanner variability, but without altering the training datasets, by mapping all the datasets towards a global “scanner space”. The algorithm does *not* require paired datasets for training, making it easy to apply for hard to acquire datasets (e.g., patients with Alzheimer’s, Parkinson’s or Huntington’s disease) or when pooling datasets from unrelated studies that are acquired in separate centers. This makes our proposed method readily applicable for pre-existing and ongoing studies which would like to remove variability caused by non-biological or systematic effects in their data analyzes.

## 2. Theory

### 2.1. The dictionary learning algorithm

Dictionary learning (Elad and Aharon, 2006; Mairal et al., 2010) aims to find a set of basis elements to efficiently approximate a given set of input vectors. This formulation optimizes both the representation  $\mathbf{D}$  (called the dictionary or the set of atoms) and the coefficients  $\boldsymbol{\alpha}$  of that representation (called the sparse codes) as opposed to using a fixed basis (e.g., Fourier, wavelets, spherical harmonics). A dictionary can be chosen to be overcomplete (i.e., more column than rows) as the algorithm is designed to only select a few atoms to approximate the input vector with a penalization on the  $\ell_1$ -norm of  $\boldsymbol{\alpha}$  to promote a sparse solution. Applications in computer vision with the goal to reduce visual artifacts include demosaicking (Mairal et al., 2009), inpainting (Mairal et al., 2010) and upsampling (Yang et al., 2012, 2010) amongst others.

In practice, local windows are used to extract spatial and angular neighborhoods of diffusion weighted images (DWIs) to create the set of vectors required for dictionary learning as in [St-Jean et al. \(2016\)](#). This is done by first extracting a small 3D region from a single DWI, which we now refer to as a patch. To include angular information, a set of patches is taken at the same spatial location across DWIs in an angular neighborhood (as defined by the angle between their associated b-vector on the sphere). This considers that patches from different DWIs at the same spatial location, but which are in fact not too far on the sphere, exhibit self-similarity which can be exploited by dictionary learning. Once this process is done, every set of patches is concatenated to a single vector  $\mathbf{X}$ . All of these vectors  $\mathbf{X}_n$  are then put in a 2D matrix  $\Omega = \{\mathbf{X}_1, \dots, \mathbf{X}_n, \dots\}$ , where  $n$  denotes one of the individual set of patches.

Once the set of patches  $\Omega$  has been extracted,  $\mathbf{D}$  can be initialized by randomly selecting  $N$  vectors from  $\Omega$  ([Mairal et al., 2010](#)). With this initial overcomplete dictionary, a sparse vector  $\alpha_n$  can be computed for each  $\mathbf{X}_n$  such that  $\mathbf{D}$  is a good approximation to reconstruct  $\mathbf{X}_n$ , that is  $\mathbf{X}_n \approx \mathbf{D}\alpha_n$ . This initial approximation can be refined iteratively by sampling randomly  $N$  new vectors  $\mathbf{X}_n \in \Omega$  and updating  $\mathbf{D}$  to better approximate those vectors. At the next iteration, a new set  $\mathbf{X}_n \in \Omega$  is randomly drawn and  $\mathbf{D}$  is updated to better approximate this new set of vectors. This iterative process can be written as

$$\arg \min_{\mathbf{D}, \alpha} \frac{1}{N} \sum_{n=1}^N \left( \frac{1}{2} \|\mathbf{X}_n - \mathbf{D}\alpha_n\|_2^2 + \lambda_i \|\alpha_n\|_1 \right) \text{ s.t. } \|\mathbf{D}_{\cdot p}\|_2 = 1 \quad (1)$$

with  $\alpha_n \in \mathbb{R}^{p \times 1}$  an array of sparse coefficients and  $\mathbf{D}$  the dictionary where each column is constrained to unit  $\ell_2$ -norm to prevent degenerated solutions.  $\lambda_i$  is a regularization parameter used at iteration  $i$  (which is further detailed in [Section 2.2](#)) to balance the  $\ell_2$ -norm promoting data similarity and the  $\ell_1$ -norm promoting sparsity of the coefficients  $\alpha_n$ . Iterative updates using [Eq. \(1\)](#) alternate between refining  $\mathbf{D}$  (and holding  $\alpha$  fixed) and computing  $\alpha$  (with  $\mathbf{D}$  held fixed) for the current set of  $\mathbf{X}_n$ . As updating  $\alpha$  needs an optimization scheme, this can be done independently for each  $\alpha_n$  using coordinate descent ([Friedman et al., 2010](#)). For updating  $\mathbf{D}$ , we use the parameter-free closed form update from [Mairal et al. \(2010, Algorithm 2\)](#), which only requires storing intermediary matrices of the previous iteration using  $\alpha$  and  $\mathbf{X}_n$  to update  $\mathbf{D}$ . Building dictionaries for the task at hand has been used previously in the context of diffusion MRI for denoising ([Gramfort et al., 2014; St-Jean et al., 2016](#)) and compressed sensing ([Gramfort et al., 2014; Merlet et al., 2013; Schwab et al., 2018](#)) amongst other tasks. Note that it is also possible to design dictionaries based on products of fixed basis or adding additional constraints such as positivity or spatial consistency to [Eq. \(1\)](#), see e.g., ([Schwab et al., 2018; Vemuri et al., 2019](#)) and references therein for examples pertaining to diffusion MRI.

## 2.2. Automatic regularization selection

[Eq. \(1\)](#) relies on a regularization term  $\lambda_i$  which can be different for each set of vectors  $\mathbf{X}_n$  at iteration  $i$ . It is, however, common to fix  $\lambda_i$  for all  $\mathbf{X}_n$  depending on some heuristics such as the size of  $\mathbf{X}_n$  ([Mairal et al., 2010](#)), the local noise variance ([St-Jean et al., 2016](#)) or through a grid search ([Gramfort et al., 2014](#)). In the present work, a search through a sequence of candidates  $\{\lambda_0, \dots, \lambda_s, \dots, \lambda_{\text{last}}\}$ , which is automatically determined for each individual  $\mathbf{X}_n$ , is instead employed using either 3-fold cross-validation (CV) and minimizing the mean squared error or by minimizing the Akaike information criterion (AIC) ([Akaike, 1974; Zou et al., 2007](#)). For the AIC, the number of non-zero coefficients in  $\alpha_n$  provides an unbiased estimate of degrees of freedom for the model ([Tibshirani and Taylor, 2012; Zou et al., 2007](#)). We use the AIC for normally distributed errors in least-squares problems from [Burnham and Anderson \(2004\)](#)

$$AIC_{\lambda_i} = \arg \min_{\lambda_s} m \log \left( \frac{\|\mathbf{X}_n - \mathbf{D}\alpha_{\lambda_s}\|_2^2}{m} \right) + 2\text{df}(\alpha_{\lambda_s}) \quad (2)$$

with  $m$  the number of elements of  $\mathbf{X}_n$ . In practice, this sequence of  $\lambda_s$  is chosen automatically on a log scale starting from  $\lambda_0$  (providing the null solution  $\alpha_{\lambda_0} = 0$ ) up to  $\lambda_{\text{last}} = \epsilon > 0$  (providing the regular least squares solution) ([Friedman et al., 2010](#)). The solution  $\alpha_n$  at  $\lambda_s$  is then used as a starting estimate for the next value of  $\lambda_{s+1}$ . The process can be terminated early if the cost function [Eq. \(1\)](#) does not change

much (e.g., the difference between the solution at  $\lambda_s$  and  $\lambda_{s+1}$  is below  $10^{-5}$ ) for decreasing values of  $\lambda_s$ , preventing computation of similar solutions.

### 3. Methods

#### 3.1. Building an optimal representation across scanners

For harmonization based on dictionary learning, all 3D patches of small spatial and angular local neighborhoods inside a brain mask were extracted from the available training datasets for a given scanner as done in (St-Jean et al., 2016; Tax et al., 2019). Since different patch sizes are used depending on the reconstruction task, Sections 3.2 and 3.5 detail each case that we study in this manuscript. Only patches present inside a brain mask were used for computation and reconstruction. These patches were reorganized as column arrays  $\Omega = \{\mathbf{X}_1, \dots, \mathbf{X}_n, \dots\}$  with each  $\mathbf{X}_n \in \mathbb{R}^{m \times 1}$  represented as vectors of size  $m$ . Each volume was mean subtracted and each patch  $\mathbf{X}_n$  was scaled to have unit variance (Friedman et al., 2010). Subsequently, features were automatically created from the target scanner datasets using dictionary learning as detailed in Section 2.1. A dictionary  $\mathbf{D} \in \mathbb{R}^{m \times p}$  was initialized with  $p$  vectors  $\mathbf{X}_{m \times 1} \in \Omega$  randomly chosen, where  $\mathbf{D}$  is set to have twice as many columns as rows (i.e.,  $p = 2m$ ). Updates using Eq. (1) were carried for 500 iterations using a batchsize of  $N = 32$ . The coefficients  $\alpha_n$  were unscaled afterwards.

Once a dictionary  $\mathbf{D}$  has been computed, the new, harmonized representation (possibly from a *different* scanner) can be obtained by computing  $\alpha_n$  for every  $\mathbf{X}_n \in \Omega$ . As  $\mathbf{D}$  was created to reconstruct data from a chosen target scanner, it contains generic features tailored to this specific target scanner which are not necessarily present in the set of patches  $\Omega$  extracted from a different scanner. As such, reconstruction using  $\mathbf{D}_{\text{target}}$  created from  $\Omega_{\text{target}}$  can be used to map  $\Omega_{\text{source}}$  towards  $\Omega_{\text{target}}$ , that is  $\mathbf{X}_{n_{\text{harmonized}}} = \mathbf{D}_{\text{target}} \alpha_n$  by using  $\mathbf{X}_{n_{\text{source}}}$  and holding  $\mathbf{D}_{\text{target}}$  fixed while solving Eq. (1) for  $\alpha_n$ . These specially designed features from  $\Omega_{\text{target}}$  are not necessarily present in  $\Omega_{\text{source}}$ , therefore eliminating the source scanner specific effects as they are not contained in  $\mathbf{D}_{\text{target}}$ .

Downsampling  $\mathbf{D}_{\text{target}}$  into  $\mathbf{D}_{\text{small}}$  can also be used to reconstruct data at a different resolution than initially acquired by creating an implicit mapping between two different spatial resolutions. This is done by finding the coefficients  $\alpha$  by holding  $\mathbf{D}_{\text{small}}$  fixed when solving Eq. (1), but using  $\mathbf{D}_{\text{target}}$  for the final reconstruction such that  $\mathbf{X}_{n_{\text{harmonized}}} = \mathbf{D}_{\text{target}} \alpha_n$ . This reconstruction with the full sized dictionary provides an upsampled version of  $\mathbf{X}_n$ , the implicit mapping being guaranteed by sharing the same coefficients  $\alpha_n$  for both reconstructions. A similar idea has been exploited previously for the 3D reconstruction of T1w images by Rueda et al. (2013) and in diffusion MRI by St-Jean et al. (2017) in the context of single image upsampling. The general reconstruction process for the harmonization of datasets between scanners is illustrated in Fig. 1. Our implementation of the harmonization algorithm is detailed in Appendix A and also available in both source form and as a Docker container<sup>1</sup> (St-Jean et al., 2019).

#### 3.2. Reconstruction tasks of the challenge

For the reconstruction in task 1 (matched resolution scanner-to-scanner mapping), the dictionary  $\mathbf{D}_{\text{target}}$  was created using patches of size  $3 \times 3 \times 3$  with 5 angular neighbors and one  $b = 0$  s/mm<sup>2</sup> image in each block. Optimization for constructing  $\mathbf{D}_{\text{target}}$  with Eq. (1) was performed using 3-fold CV and reconstruction of the final harmonized datasets was done with either CV or minimizing the AIC with Eq. (2) in two separate experiments. The datasets from the GE scanner were reconstructed using the dictionary built from the Prisma or Connectom scanner datasets for their respective harmonization task. For the reconstruction in task 2 (spatial and angular resolution enhancement), patches of different spatial sizes were extracted from the images at higher resolution (patches of size  $5 \times 5 \times 5$  for the Prisma scanner and  $6 \times 6 \times 6$  for the Connectom scanner) and used for the dictionary learning algorithm as described in Section 2.1. Under the hypothesis that a larger patch is a good representation for its lower resolution counterpart when downsampled, each column of the optimized dictionary  $\mathbf{D}_{\text{target}}$  was resized to a spatial dimension of

---

<sup>1</sup><https://github.com/samuelstjean/harmonization>

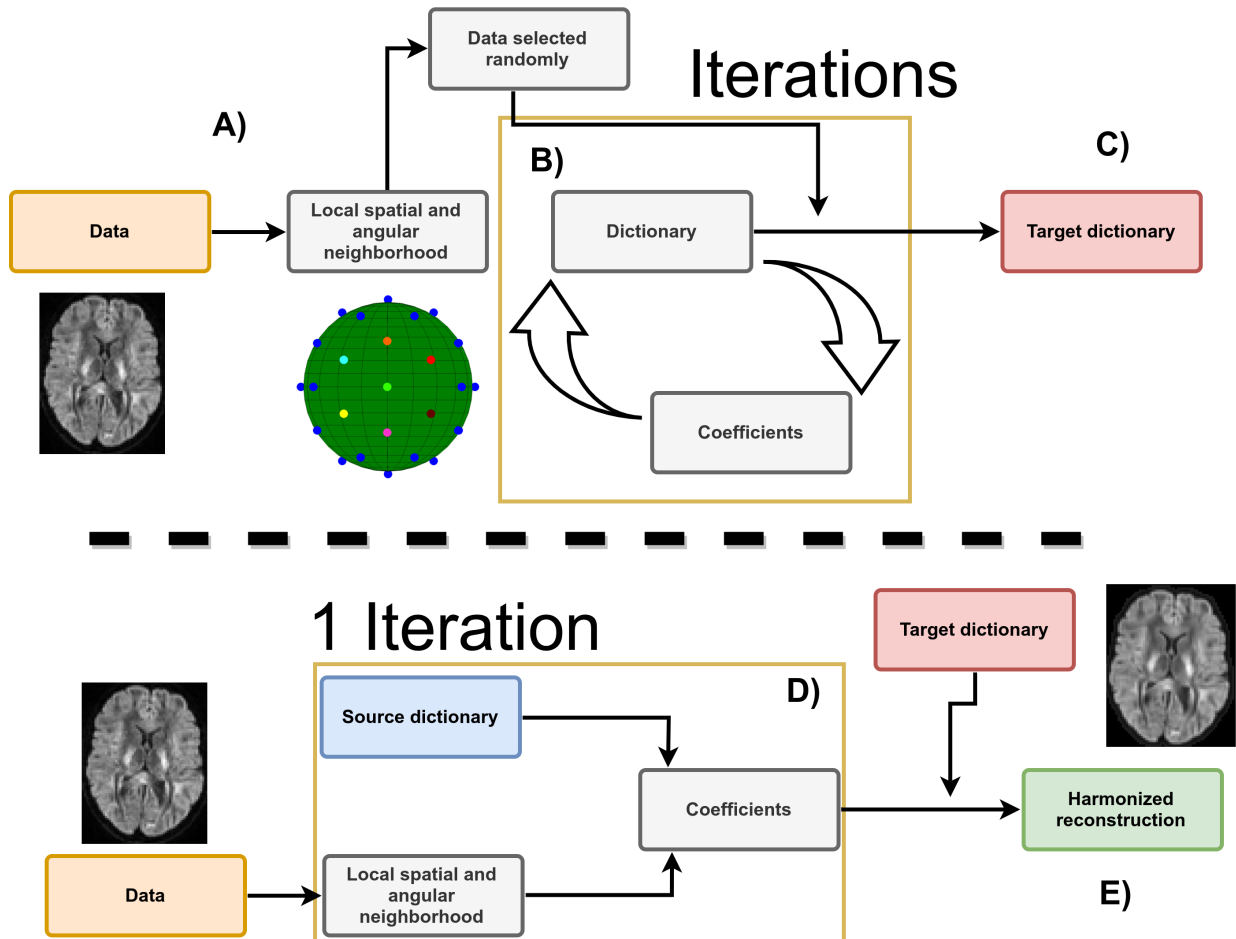

Figure 1: Schematic representation of the harmonization between scanners with adaptive dictionary learning. **A)** Local patches are decomposed into vectors  $X_n$  and a random subset is used to initialize the dictionary  $D$ . **B)** A new set of patches is drawn at every iteration and the dictionary is refined iteratively by alternating updates for the coefficients  $\alpha$  and the dictionary  $D$  using Eq. (1). **C)** After a set number of iterations, this target dictionary  $D$  can now be used to reconstruct data from a potentially different dataset. **D)** A set of coefficients is computed for each patch  $X_n$  of the input dataset with a source dictionary. For harmonization tasks, the source and target dictionary from step C) are identical. For upsampling tasks, the source dictionary is a downsampled version of the target dictionary. **E)** The harmonized reconstruction for each patch  $X_n$  is obtained by multiplying the target dictionary  $D$  and the coefficients  $\alpha_n$ .

$3 \times 3 \times 3$  and the coefficients  $\alpha$  computed for this lower resolution dictionary  $D_{\text{small}}$ . The patches were finally reconstructed by multiplying the original dictionary  $D_{\text{target}}$  with the coefficients  $\alpha$ . This creates a set of upsampled patches from the GE scanner which are both harmonized and at the same spatial resolution as either the Prisma or Connectom datasets. All reconstruction tasks were computed overnight on our computing server using 100 cores running at 2.1 GHz. On a standard desktop with a 4 cores 3.5 GHz processor, rebuilding one dataset took approximately two hours and 30 minutes with the AIC criterion.

### 3.3. Evaluation framework of the challenge

The original challenge requested from the participants to match the original gradient directions from the source to the target datasets and evaluated various scalar metrics on the diffusion weighted images. In our original submission, this matching was done with the truncated spherical harmonics (SH) basis of order 6 (Descoteaux et al., 2007) on the source dataset and sampling the basis at the gradient directions from the target scanner. In the present manuscript, we chose instead to evaluate the metrics directly in the original gradient directions as they are rotationally invariant, saving one interpolation step in the process as it could potentially introduce unwanted blurring of the data. The metrics used in the original evaluation were the apparent diffusion coefficient (ADC) and the fractional anisotropy (FA) from diffusion tensor imaging (DTI) and the rotationally invariant spherical harmonic (RISH) features of order 0 (RISH 0) and order 2 (RISH 2) of the SH basis, see Tax et al. (2019) for additional details. As our evaluation framework is slightly different, we compare our new approach with our initial version of the harmonization algorithm and with a baseline reference prediction created by trilinear interpolation from the source to the target scanner in the spirit of the original challenge.

### 3.4. Datasets and experiments

We used the datasets from the MICCAI 2017 harmonization challenge (Tax et al., 2019), consisting of ten training subjects and four test subjects acquired on three different scanners (GE, Siemens Prisma and Siemens Connectom) using different gradient strength (40 mT/m, 80 mT/m and 300 mT/m, respectively) with two acquisition protocols. Experiments are only reported for the four test subjects, which are later on denoted as subjects 'H', 'L', 'M' and 'N'. The standard protocol (ST) consists of 30 DWIs acquired at 2.4 mm isotropic with a b-value of  $b = 1200 \text{ s/mm}^2$ , 3  $b = 0 \text{ s/mm}^2$  images for the GE datasets, 4  $b = 0 \text{ s/mm}^2$  images for the Siemens datasets and  $TE = 98 \text{ ms}$ . Note that the TR is cardiac gated for the GE datasets while the Siemens datasets both use  $TR = 7200 \text{ ms}$ . The state-of-the-art (SA) protocol for the Siemens scanners contains 60 DWIs with a b-value of  $b = 1200 \text{ s/mm}^2$  and 5  $b = 0 \text{ s/mm}^2$  images. The Prisma datasets were acquired with a spatial resolution of 1.5 mm isotropic and  $TE / TR = 80 \text{ ms} / 4500 \text{ ms}$ . The Connectom datasets were acquired with a spatial resolution of 1.2 mm isotropic and  $TE / TR = 68 \text{ ms} / 5400 \text{ ms}$ . Most of the acquisition parameters were shared for the SA protocol which are listed in Table 1 with full details of the acquisition available in Tax et al. (2019). Standard preprocessing includes motion correction, EPI distortions corrections and image registration for each subject across scanners. The SA protocols were additionally corrected for gradient nonlinearity distortions. These datasets are available upon request<sup>2</sup> from the organizers. Fig. 2 shows an example of the acquired datasets for a single subject.

### 3.5. Simulations beyond the challenge

To further make our proposed harmonization algorithm widely applicable, we designed additional experiments beyond the challenge to harmonize data towards a common scanner space. As the MICCAI challenge focused on harmonization of datasets from a source scanner to a target scanner, the organizers essentially provided matching datasets of all subjects across all scanners. This data collection would be appropriate, for example, in a longitudinal study design with scanner hardware upgrades during the study and subsequent data analysis. However, such an experimental setup might not be available in practice when harmonizing

---

<sup>2</sup><https://www.cardiff.ac.uk/cardiff-university-brain-research-imaging-centre/research/projects/cross-scanner-and-cross-protocol-diffusion-MRI-data-harmonisation>



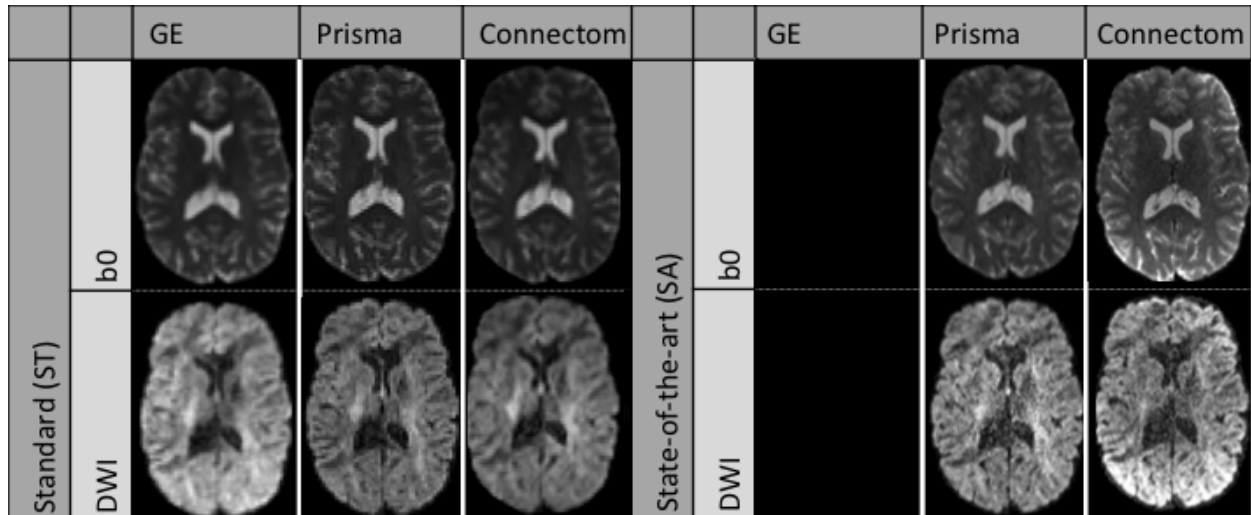

Figure 2: Example  $b = 0$  s/mm<sup>2</sup> images (top row) and  $b = 1200$  s/mm<sup>2</sup> images (bottom row) for a single subject acquired on the three scanners after preprocessing. The standard protocol (ST) is shown on the left and the state-of-the-art protocol (SA) is shown on the right. Note that the challenge asked participants to harmonize the GE ST protocol towards the two other scanners, but no SA protocol is available for the GE scanner. The figure is adapted from [Tax et al. \(2019\)](#), available under the CC-BY 4.0 license.

| Scanner                                        | GE 40 mT/m      | Siemens Prisma 80 mT/m |                       | Siemens Connectom 300 mT/m |                       |
|------------------------------------------------|-----------------|------------------------|-----------------------|----------------------------|-----------------------|
| Protocol                                       | Standard (ST)   | Standard (ST)          | State-of-the-art (SA) | Standard (ST)              | State-of-the-art (SA) |
| Sequence                                       | TRSE            | PGSE                   | PGSE                  | PGSE                       | PGSE                  |
| # directions per b-value                       | 30              | 30                     | 60                    | 30                         | 60                    |
| TE [ms]                                        | 89              | 89                     | 80                    | 89                         | 68                    |
| TR [ms]                                        | Cardiac gated   | 7200                   | 4500                  | 7200                       | 5400                  |
| $\Delta/\delta$ [ms]                           |                 | 41.4/26.0              | 38.3/19.5             | 41.8/28.5                  | 31.1/8.5              |
| $\delta_1 = \delta_4/\delta_2 = \delta_3$ [ms] | 11.23/17.84     |                        |                       |                            |                       |
| Acquired voxel size [mm <sup>3</sup> ]         | 2.4 x 2.4 x 2.4 | 2.4 x 2.4 x 2.4        | 1.5 x 1.5 x 1.5       | 2.4 x 2.4 x 2.4            | 1.2 x 1.2 x 1.2       |
| Reconstructed voxel size                       | 1.8 x 1.8 x 2.4 | 1.8 x 1.8 x 2.4        | 1.5 x 1.5 x 1.5       | 1.8 x 1.8 x 2.4            | 1.2 x 1.2 x 1.2       |
| SMS factor                                     | 1               | 1                      | 3                     | 1                          | 2                     |
| Parallel imaging                               | ASSET 2         | GRAPPA 2               | GRAPPA 2              | GRAPPA 2                   | GRAPPA 2              |
| Bandwidth [Hz/Px]                              | 3906            | 2004                   | 1476                  | 2004                       | 1544                  |
| Partial Fourier                                | 5/6             | –                      | 6/8                   | 6/8                        | 6/8                   |
| Coil combine                                   |                 | Adaptive combine       | Sum of Squares        | Adaptive combine           | Adaptive combine      |
| Head coil                                      | 8 channel       | 32 channel             | 32 channel            | 32 channel                 | 32 channel            |

Table 1: Acquisition parameters of the datasets for the three different scanners. TRSE: twice-refocused spin-echo, PGSE: pulsed-gradient spin-echo. The table is adapted from [Tax et al. \(2019\)](#).

datasets from multiple centers or studies where data collection is done only once per subject e.g., to reduce costs associated with scan time or reduce traveling of the participants.

The additional experiments consist of harmonizing all the datasets from the ST protocol at once and predicting their harmonized version using this common basis instead of creating one dictionary per scanner and per protocol. To ensure that the scanner effects are properly removed, the test datasets were also altered in a small region with a simulated free water compartment as described in Section 3.6. As these altered datasets were never “seen” by the harmonization algorithm, we can now quantify if the induced effects are properly reconstructed as they were not present in the training set in the first place. This experiment is similar to creating a common space on a larger set of healthy subjects and finally harmonizing data from the remaining healthy subjects and “patients” towards this common space. In our current setup, the harmonization algorithm is not aware that the datasets are in fact from matched subjects and, by design, could also be used on unpaired training datasets.

### 3.6. Alterations of the original datasets

To create the altered version of the test datasets, a region of 3000 voxels ( $15 \times 20 \times 10$  voxels) in the right hemisphere was selected at the same spatial location in image space. Every voxel in the selected region was separately affected by a free water compartment to mimic infiltration of edema according to

$$S_{b_{\text{altered}}} = S_b + fS_0 \exp(-bD_{\text{csf}}) \quad (3)$$

with  $S_{b_{\text{altered}}}$  the new signal in the voxel,  $S_b$  the original signal in the voxel at b-value  $b$  and  $S_0$  the signal in the  $b = 0$  s/mm<sup>2</sup> image,  $f$  is the fraction of the free water compartment, which is drawn randomly for every voxel from a uniform distribution  $U(0.7, 0.9)$  and  $D_{\text{csf}} = 3 \times 10^{-3}$  mm<sup>2</sup>/s is the nominal value of diffusivity for free water (e.g., cerebrospinal fluid (CSF)) at 37° celsius (Pasternak et al., 2009; Pierpaoli and Jones, 2004). Since the individual subjects are not aligned, but all scans from a given subject are registered, this introduces normal variability in terms of the number of white matter and gray matter voxels which would be affected by edema and their location in a patient subject.

### 3.7. Evaluation metrics

*Error and accuracy of predicted metrics.* We reproduced parts of the analyses conducted in the original CDMRI challenge from Tax et al. (2019), namely the per voxel error for each metric as computed by the mean normalized error (MNE) and the voxelwise error. Denoting the target data to be reproduced as *acquired* (Prisma or Connectom scanners) and the source data to be harmonized as *predicted* (GE scanner), the MNE is defined as  $\text{MNE} = |(\text{predicted} - \text{acquired})| / \text{acquired}$  and the error is defined as  $\text{error} = \text{predicted} - \text{acquired}$ . The original challenge reports values taken either globally in a brain mask, in FreeSurfer regions of interest (ROI) and excluding poorly performing regions, or the median value computed in sliding windows. Since the masks of these ROIs were not released for the challenge, we instead report boxplots of the two metrics using the brain masks from the challenge as this reports the global median error in addition to the global mean error and additional quantiles of their distribution. To prevent outliers from affecting the boxplots (particularly located at the edges of the brain masks), we clip the MNE and error values at the lowest 0.1% and largest 99.9% for each dataset separately.

*Kullback-Leibler divergence as a measure of similarity.* As the voxelwise difference may not be fully indicative of the global trend of the harmonization procedure between datasets (e.g., due to registration errors), we also computed the Kullback-Leibler (KL) divergence (Kullback and Leibler, 1951) between the distributions of each harmonized dataset from the GE scanner and its counterpart from the target scanner for each of the four metrics. The KL divergence is a measure of similarity between two probability distributions  $P(x)$  and  $Q(x)$  where lower values indicate a higher similarity and  $\text{KL}(P, Q) = 0$  when  $P(x) = Q(x)$ . In its discrete form, the Kullback-Leibler divergence is given by

$$\text{KL}(P, Q) = \sum_k P_k \log \left( \frac{P_k}{Q_k} \right), \quad (4)$$



where  $P_k$  is the “candidate” probability distribution,  $Q_k$  the true probability distribution and  $k$  represents the number of discrete histogram bins. The measure is not symmetric, that is  $\text{KL}(P, Q) \neq \text{KL}(Q, P)$  in general. We instead use the symmetric version of the KL divergence as originally defined by [Kullback and Leibler \(1951\)](#)

$$\text{KL}_{sym} = \text{KL}(P, Q) + \text{KL}(Q, P). \quad (5)$$

In practice, a discrete distribution can be constructed from a set of samples by binning and counting the data. By normalizing each bin so that their sum is 1, we obtain a (discrete) probability mass function. For each metric, the discrete distribution was created with  $k = 100$  equally spaced bins. We also remove all elements with probability 0 from either  $P_k$  or  $Q_k$  (if any) to prevent division by 0 in [Eq. \(4\)](#).

*Statistical testing and effect size in the presence of alterations.* We conducted Student’s t-test for paired samples for each subject separately between each scanner in the predefined region of 3000 voxels with simulated changes ([Student, 1908](#)). This was done on both the normal datasets (testing between scanners) and the altered datasets (testing between scanners and additionally between the normal and altered datasets). The p-values from the tests were subsequently corrected for the false discovery rate (FDR) at a level of  $\alpha = 0.05$  ([Benjamini and Hochberg, 1995](#)). In addition, we also report the effect size of those paired t-tests as computed by Hedges’  $g$  ([Hedges, 1981](#); [Lakens, 2013](#)), which we redefine as

$$g = \frac{|\mu_1 - \mu_2|}{(\sigma_1 + \sigma_2)/2} \times \left(1 - \frac{3}{4(n_1 + n_2) - 9}\right), \quad (6)$$

where  $\mu_i$ ,  $\sigma_i$  and  $n_i$  are the mean, the standard deviation, and the size of sample  $i$ , respectively. A value of  $g = 1$  indicates that the difference between the means is of one standard deviation, with larger values indicating larger effect sizes as reported by the difference in the group means. In the original definition of [Hedges \(1981\)](#),  $g$  is not enforced to be positive. We instead report the absolute value of  $g$  as we do not know *a priori* which mean is larger than the other, but are only interested in the magnitude of the effect rather than its sign. With this definition, values of  $g$  reported for the test between a given subject for two different scanners which are lower than the reference method indicate an improvement by removing scanner specific effects. On the other hand, similar values of  $g$  between the reference and the harmonized dataset for a given subject and its altered counterpart on the same scanner indicates preservation of the simulated effects as it is the *only* difference between these two datasets by construction.

## 4. Results

### 4.1. Results from the challenge

*Mapping between scanners for matched acquisition protocols.* [Fig. 3](#) shows the KL symmetric divergence as presented in [Section 3.7](#) for the standard protocol. In general, the baseline has a higher KL value than the other methods on the Connectom scanner. The CV based method is generally tied or outperforms the AIC based method. For the Prisma scanner, results show that the AIC performs best with the CV based method following the baseline reference. In the case of the ADC metric, our initial algorithm outperforms the three other methods for some subjects.

[Fig. 4](#) shows the distribution (as boxplots) in the absolute mean normalized error and mean error of the four metrics for the standard protocol. The MNE is almost tied or slightly higher for the baseline method than the alternatives for both scanners. For the FA and RISH 2 metrics, the baseline error is tied or larger than the other methods. For the voxelwise error, all methods underestimate the ADC and overestimate the RISH 0 on average while the FA and RISH 2 metrics show a different pattern depending on the scanner. For the Connectom scanner, the CV based method generally has an average error around 0 for the FA while the AIC and our initial algorithm generally overestimates the metric. The baseline is on the other spectrum and generally underestimates the FA. On the Prisma scanner, the effect is reversed; there is a general overestimation of the FA while the error committed by the AIC based method is in general close to 0. The RISH 2 error follows the same pattern as the FA error on both scanners for the four compared methods.

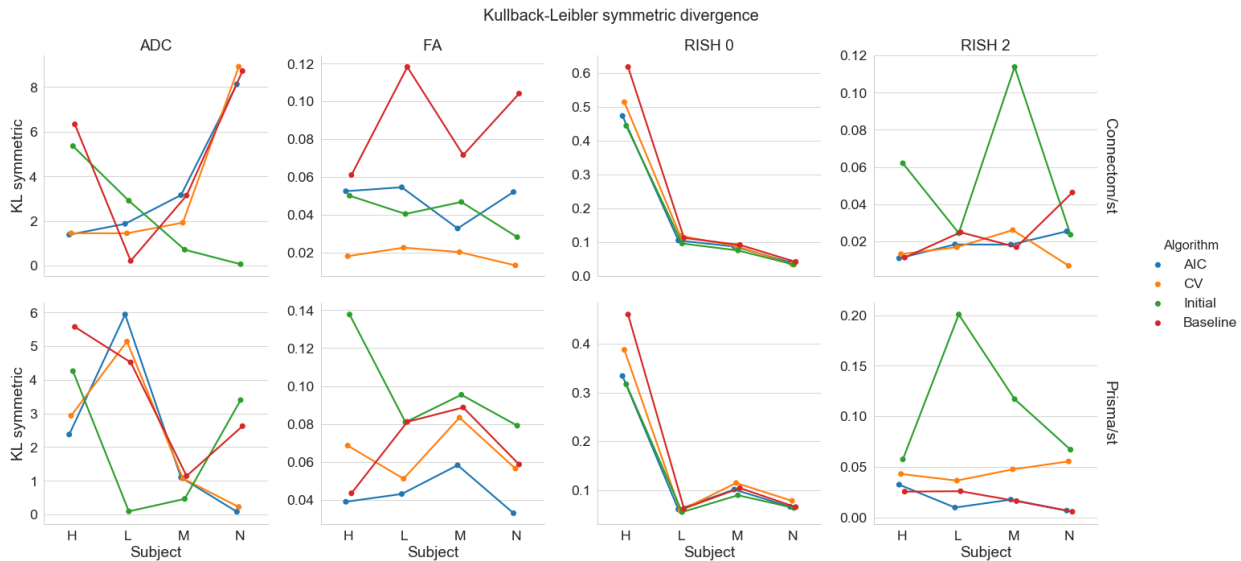

Figure 3: KL symmetric divergence (where lower is better) for the harmonization task at the same resolution between the GE ST datasets and the Connectom ST (top row) or the Prisma ST (bottom row) datasets on the four test subjects ('H', 'L', 'M' and 'N'). Each metric is organized by column (ADC, FA, RISH 0 and RISH 2) for the four compared algorithms (AIC in blue, CV in orange, our initial version of the harmonization algorithm in green and the baseline comparison in red).

*Mapping between scanners across spatial resolutions.* Fig. 5 shows the KL symmetric divergence for the second task of the challenge, mapping the GE ST protocol datasets to the SA protocols of the Prisma or Connectom scanners. For the Connectom scanner, the AIC based algorithm and our initial algorithm, which is also AIC based, performs best in most cases. The CV based algorithm also outperforms the baseline method for the ADC and RISH 0 metrics. For the Prisma scanner, the AIC outperforms most of the compared methods or is tied with the CV. Notably, the baseline ranks second for the FA and RISH 2 metrics, but is the worst performer for the ADC and the RISH 0 metrics.

Fig. 6 shows results for the absolute mean normalized error and mean error for all algorithms on harmonizing the SA protocol. For the Connectom scanner, the baseline ranks last for most subjects on the isotropy metrics (ADC and RISH 0) while it only performs slightly better than the CV based algorithm for the anisotropy metrics (FA and RISH 2). On the Prisma scanner, results are similar for the ADC and RISH 0 metrics. For the FA metrics, the best performance is obtained with the AIC based method while the baseline is better for harmonizing the RISH 2 metric for three of the subjects.

Now looking at the mean error, results show that the ADC metric is underestimated for all methods and on both scanners with the three methods usually outperforming the baseline comparison. The FA, RISH 0 and RISH 2 metrics are instead overestimated. For the FA metric, the AIC and our initial algorithm commit less error on average than the baseline on the Connectom scanner. On the Prisma scanner, only the AIC has an average error lower than the baseline. All methods perform better or almost equal on average to the baseline comparison for the RISH 0 metric. The RISH 2 metric shows a scanner dependent pattern; on the Connectom scanner, the best performing method is our initial algorithm followed by the AIC based algorithm while on the Prisma scanner, the lowest error is achieved by the AIC based method.

In general, results show that the isotropy metrics (ADC and RISH 0) are subject to global scanner effects while the anisotropy metrics (FA and RISH 2) may be subject to orientation dependent effects. These effects are also likely different for each scanner since the gradient strength and timings are different, even if the b-values are matched. In these experiments, the target scanner is untouched and therefore still contains its own scanner effect when computing the voxelwise error of each harmonization algorithm.

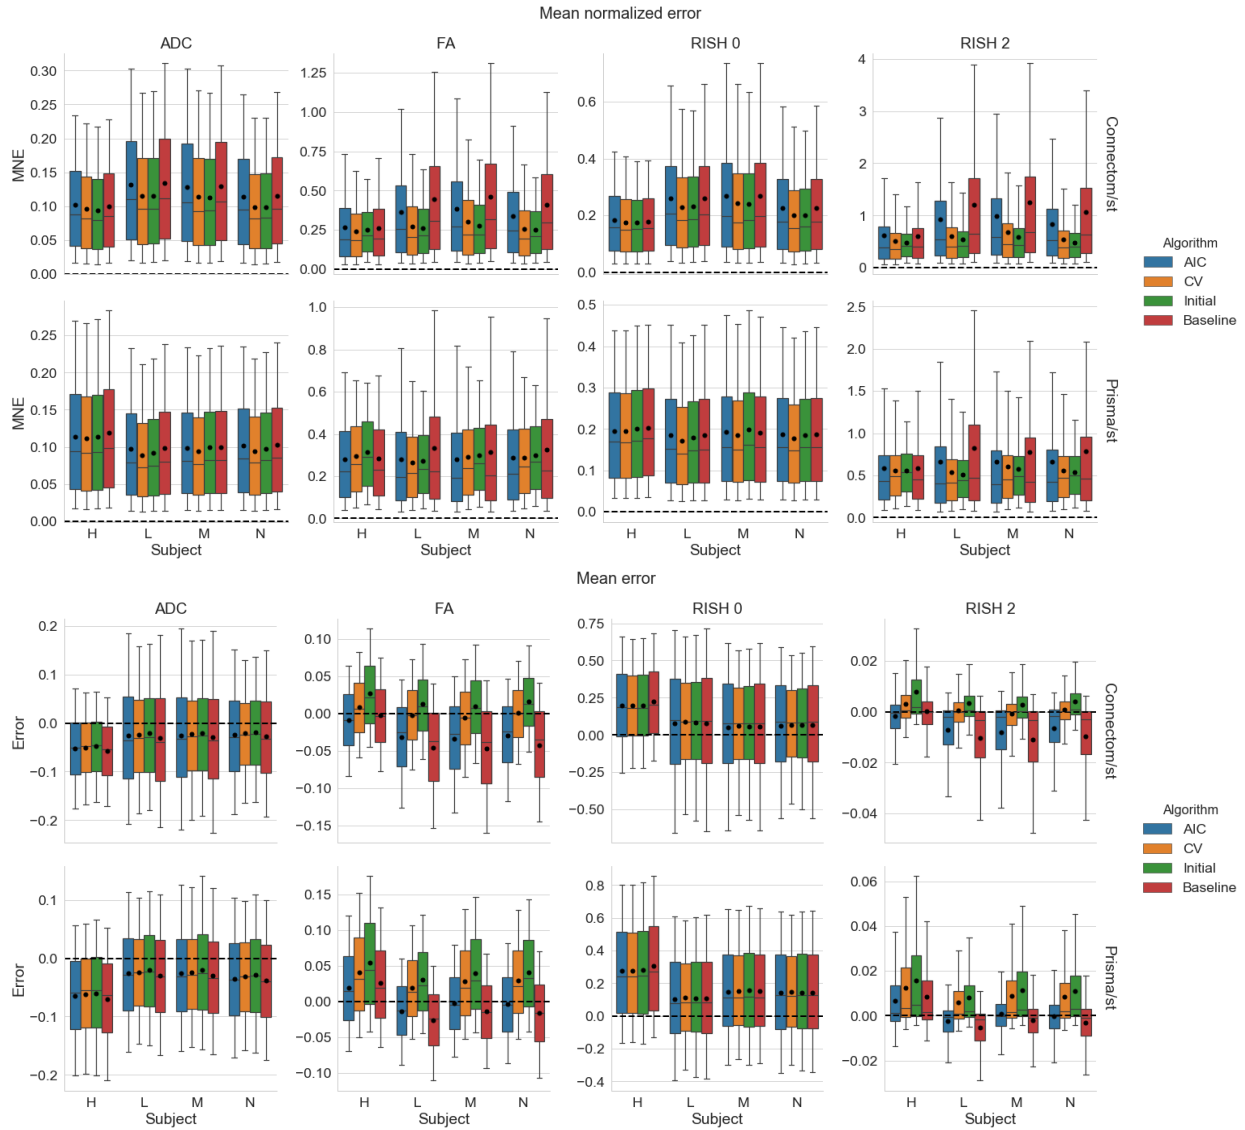

Figure 4: Boxplots of the voxelwise mean normalized error (top) and error (bottom) for each metric, following the same conventions detailed in Fig. 3. The black dot shows the mean error and the dashed line indicates an error of 0, representing a perfect match between the harmonized GE dataset and the dataset for the target scanner.

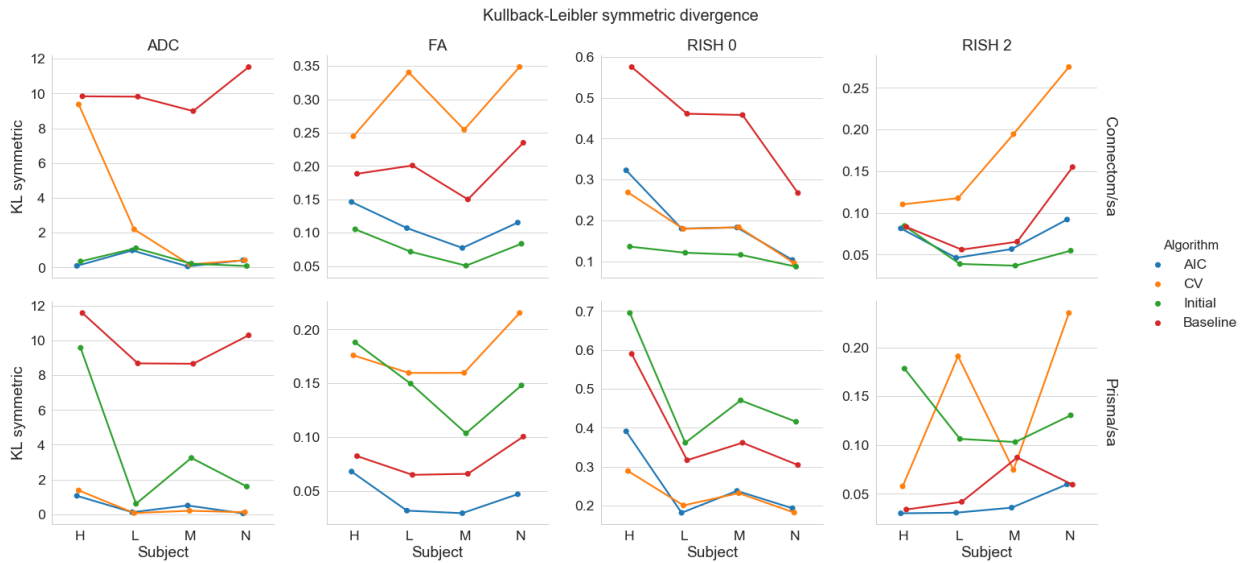

Figure 5: Symmetric KL divergence (where lower is better) for the harmonization task across resolution between the GE ST datasets and the Connectom SA (top row) or the Prisma SA (bottom row) datasets. The organization is the same as previously used in Fig. 3.

#### 4.2. Mapping original and altered datasets towards a common space

In these experiments, alterations were made to the test set as previously described in Section 3.6. As these altered datasets were never used for training, we can quantify the removal of scanner effects and the preservation of the alterations by comparing solely the altered regions with their original counterpart in each subject, free of processing effects. In these experiments, the baseline comparison is to not process the datasets at all since the datasets are altered versions of themselves, therefore not requiring any interpolation or resampling. As these experiments are outside of the challenge’s scope, they are not covered by our initial algorithm and therefore the “previous” category is not presented in this section. Fig. 7 shows the original and altered metrics for one subject on the raw data and after harmonization with the AIC and CV based algorithms and Fig. 8 shows the relative percentage difference between the raw datasets and their harmonized counterpart. We define the relative percentage difference as  $\text{difference} = 100 \times (\text{harmonized} - \text{raw}) / \text{raw}$ . The alterations is mostly visible on the  $b = 0 \text{ s/mm}^2$  image while the  $b = 1200 \text{ s/mm}^2$  image is only slightly affected due to the high diffusivity of the CSF compartment. However, the differences are visible on the diffusion derived maps, seen as an increase in ADC and a reduction for the FA, RISH 0 and RISH 2 metrics. Visually, harmonized datasets do not seem different from their original counterpart, but the difference maps show that small differences are present with the CV method generally showing larger differences than the AIC method. Notably, the anisotropy metrics (FA and RISH 2) are lower after harmonization while the difference for the isotropy metric (ADC and RISH 0) is distributed around 0.

Fig. 9 shows boxplots of the effect size as computed by a paired t-test after harmonization towards a common space for all scanners. Tests were conducted for every subject between each scanner in addition to the altered versions of the datasets as previously described in Section 3.7. For the ADC metric, both methods yield a lower effect size on average than the raw, unprocessed data and preserve the effect size due to the alterations as shown in the middle row. The RISH 0 metric shows similar behavior with the CV based method producing an average effect size slightly higher than the raw datasets. Now looking at the anisotropy metrics (FA and RISH 2), the effect size is reduced or equal on average in most cases (except for subject ‘H’ when only one scan is altered) when scans are harmonized with the AIC algorithm. The CV based algorithm shows a higher effect size for harmonization between scans and a lower effect size when both scans are altered. As we only report the absolute value of the effect size, this is due to both a lower group mean and group standard deviation than the raw datasets. The harmonization process is likely only

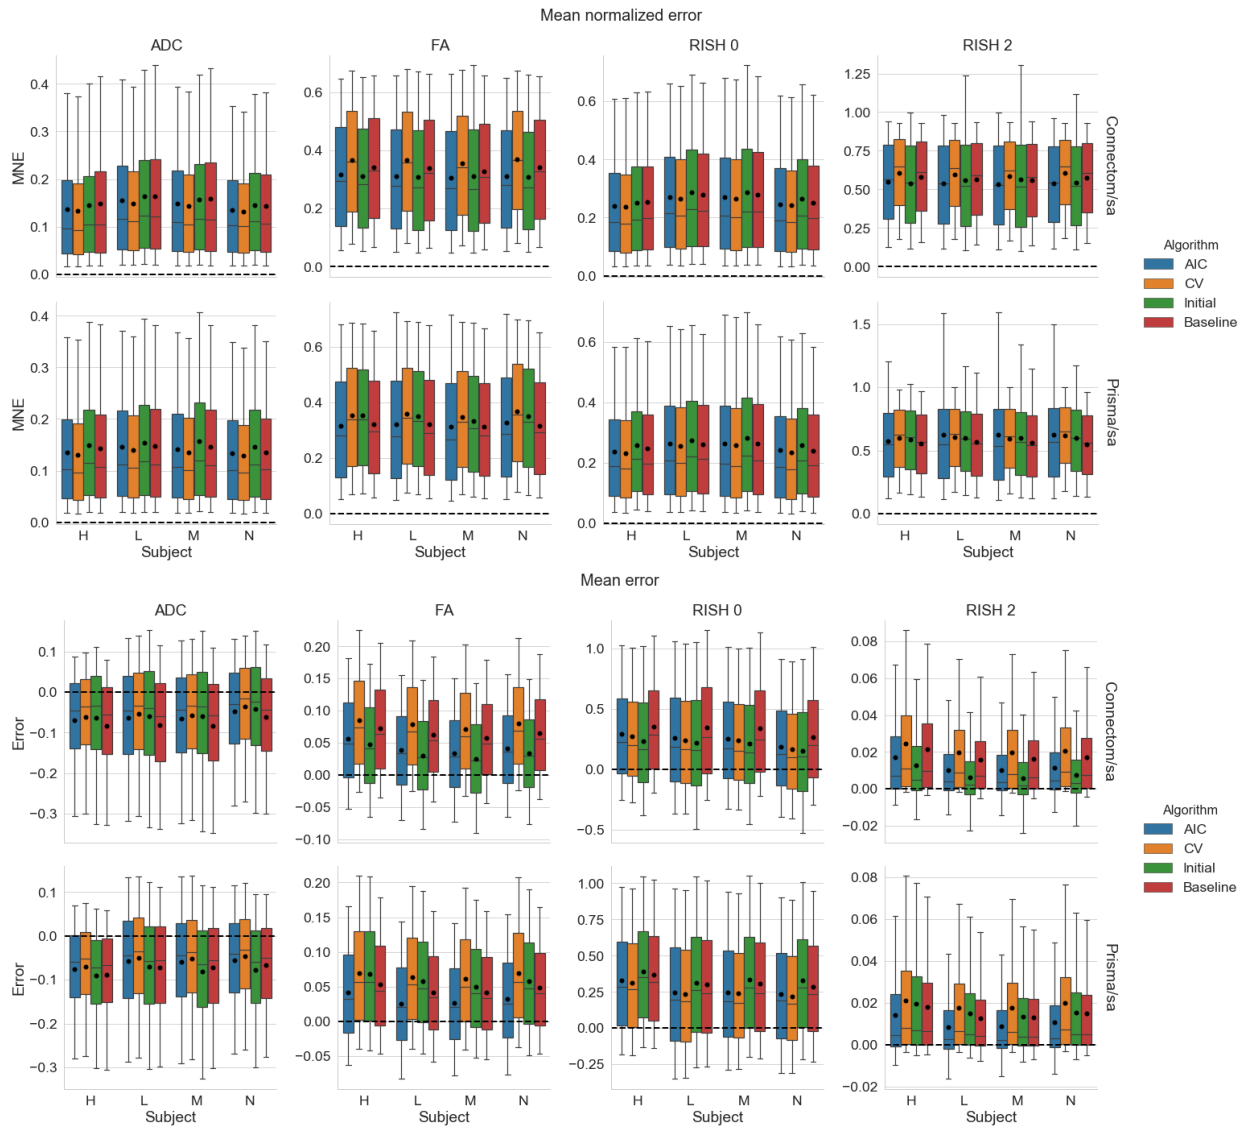

Figure 6: Boxplots of the voxelwise mean normalized error (top) and error (bottom) of each metric for the four algorithms. The black dot shows the mean error and the dashed line indicates an error of 0. The organization follows the conventions of Fig. 4.

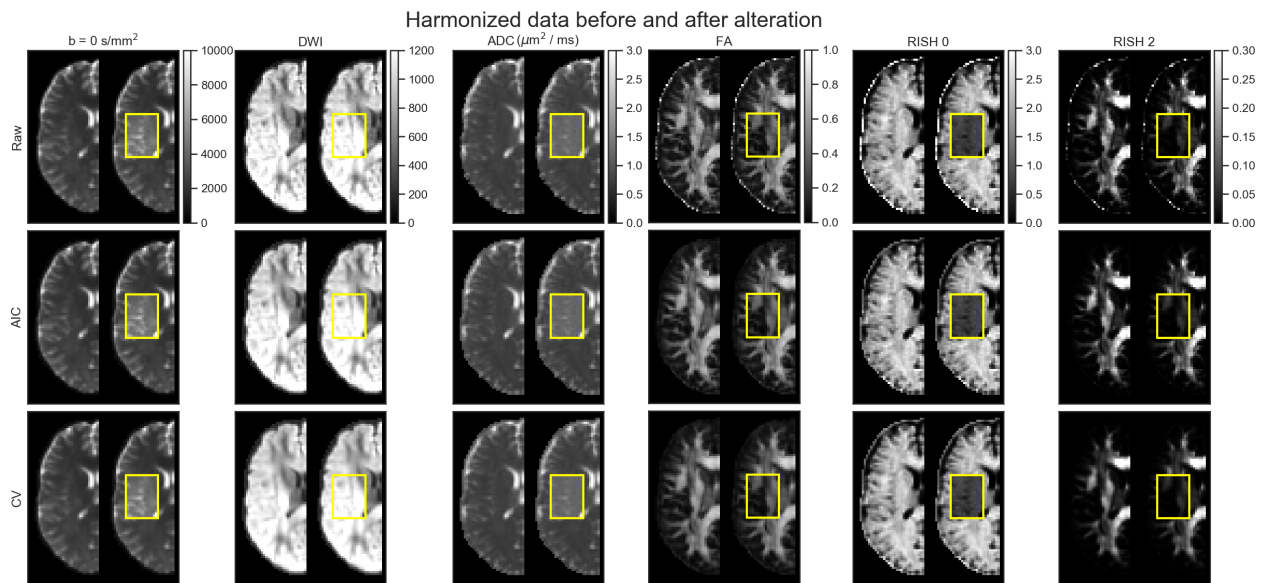

Figure 7: Exemplar slice of subject 'H' on the GE scanner as original (left half) and altered (right half) metrics. Only the affected portion of the data (yellow box) is analyzed in paired statistical testing against the same location in the original dataset. Each column shows (from left to right) a  $b = 0$  s/mm<sup>2</sup> image, a DWI at  $b = 1200$  s/mm<sup>2</sup>, the FA, ADC, RISH 0 and RISH 2 metrics with a common colorbar per column. The top row shows the raw data, the middle row shows the data harmonized using the AIC and the bottom row shows the harmonized data using the CV. The  $b = 0$  s/mm<sup>2</sup> image, the DWI and the ADC map are increased after adding the free water compartment while the FA, RISH 0 and RISH 2 metrics are instead lower in their altered counterpart.

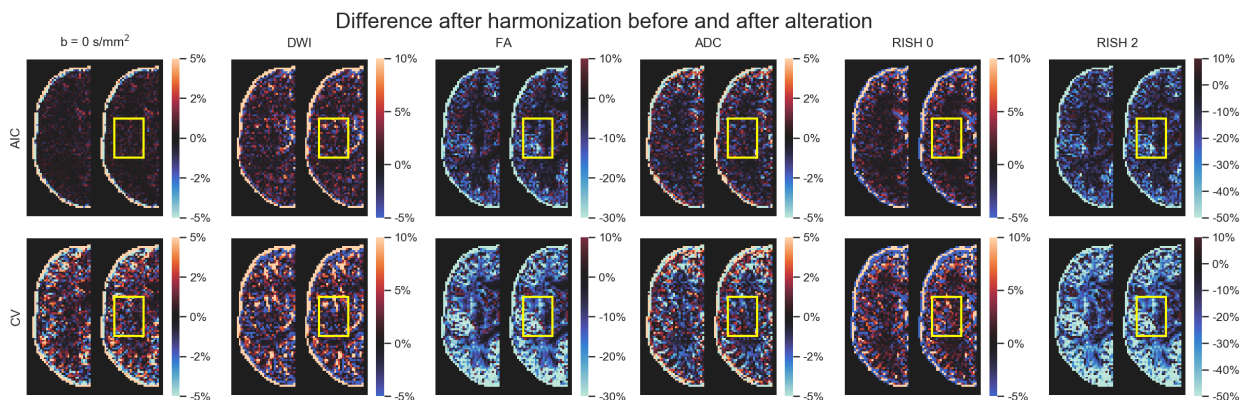

Figure 8: Exemplar slice of subject 'H' on the GE scanner as original (left half) and altered (right half) metrics. Each column shows (from left to right) a  $b = 0$  s/mm<sup>2</sup> image, a DWI at  $b = 1200$  s/mm<sup>2</sup>, the FA, ADC, RISH 0 and RISH 2 metrics with a common colorbar per column as in Fig. 7. The top row (resp. the bottom row) shows the relative percentage difference between the harmonized data using the AIC (resp. the CV) and the raw data.



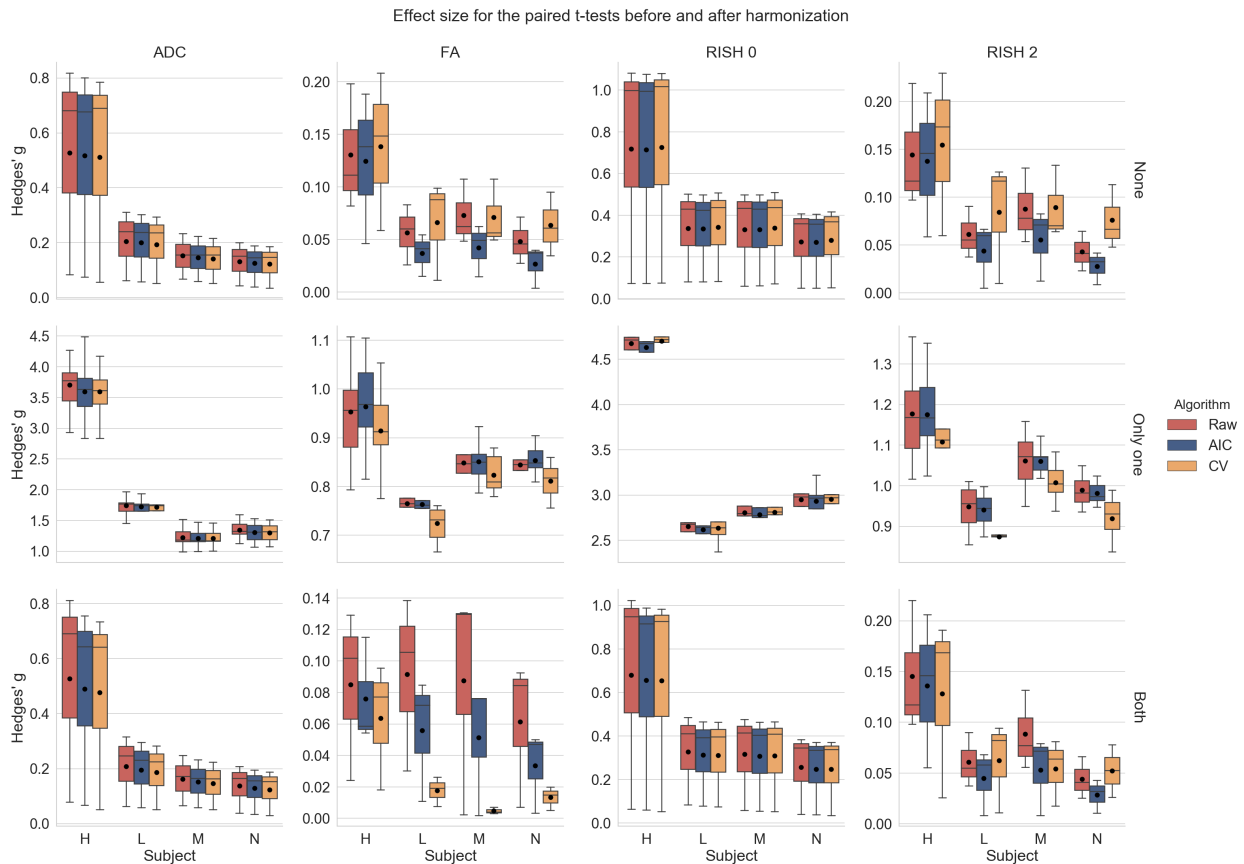

Figure 9: Boxplots of Hedges'  $g$  effect size for each metric with the mean value as the black dot. The raw data is shown in red (no harmonization), the data harmonized with the AIC in blue and finally the data harmonized with the CV in orange, similarly to the previous figures. The top row shows the effect size when both datasets are in their original version (**None** of the datasets are altered), the middle row when **only one** of the dataset is altered and the bottom row when **both** datasets are altered as indicated on the right of each row. The top and bottom row are only affected by scanner effects. The middle row shows larger effects size due to one of the compared dataset being altered in addition to the scanner effects.

removing scanner effects present in each dataset as the middle row (where only one of the compared dataset is affected) shows similar reduction in effect size, but is still on the same magnitude as the raw datasets since the alteration is preserved.

Fig. 10 shows the effect size, with a 95% confidence interval (CI), for the paired t-test between the original and altered datasets on each scanner. While Fig. 9 showed the general trend for all results, we instead now focus on the effect size attributable solely to the alterations we previously induced. Results show that the ADC and RISH 0 metrics have the smallest CI, showing the lowest variability in the 3000 voxels in the altered region. All CI are overlapping and therefore have a 95% chance of containing the true mean effect size for every case. The FA and RISH 2 metrics have both larger CI, showing larger variability in their sample values, but are overlapping with the raw datasets CI in most cases. Only the CV based harmonization method CI is outside the raw datasets CI for two cases. This shows that the effect size is likely preserved after applying the harmonization algorithm in most cases since the only source of variability is the effects we induced in that region to create the altered datasets. Supplementary materials 1 contains the individual effect sizes, p-values and other intermediary statistics for every tested combination which generated the boxplots shown in Fig. 9.

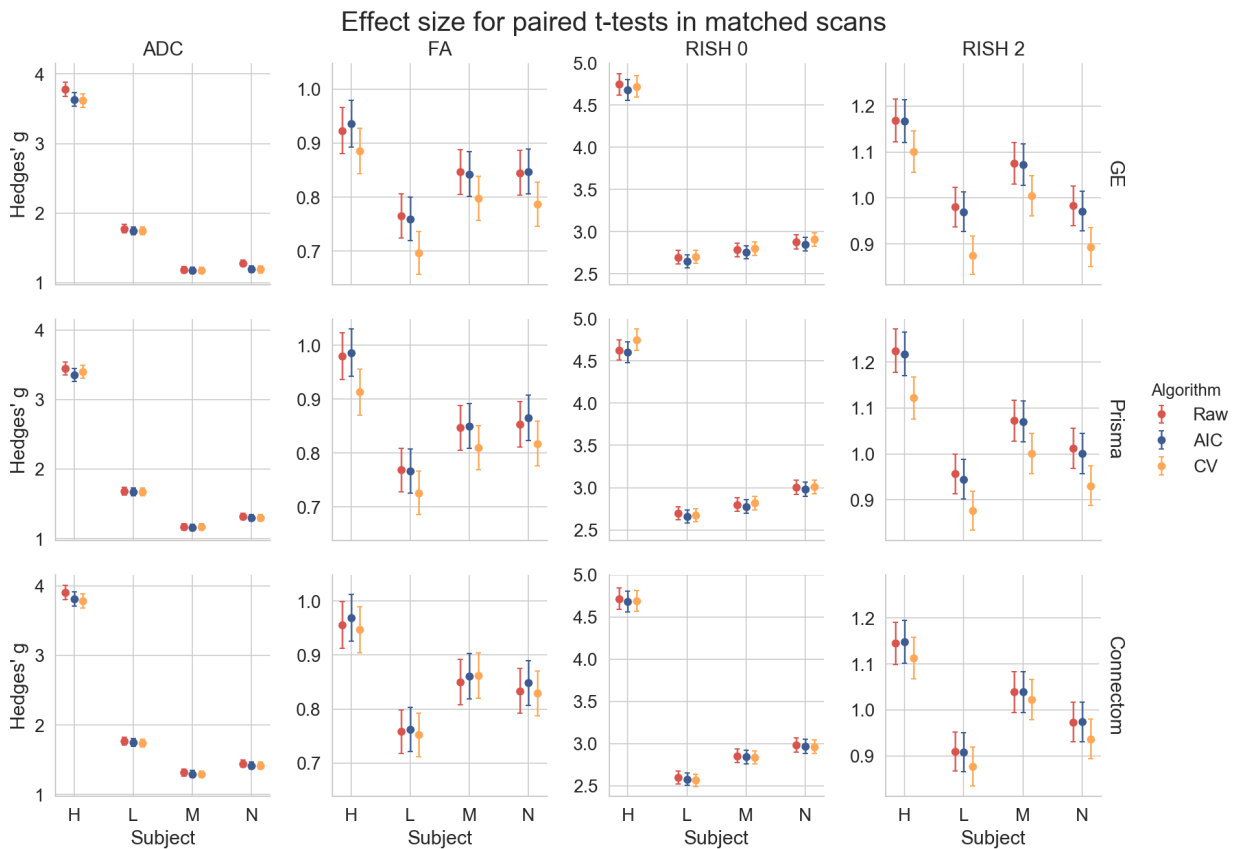

Figure 10: Hedges' g effect size for each metric between the original and altered datasets on the same scanner with a 95% CI. The top row shows the effect size between the original and altered dataset on the GE scanner, the middle row for the Prisma scanner and the bottom row for the Connectom scanner. Most of the CI are overlapping except for the CV in the cases of subject 'L' on the GE scanner and subject 'H' on the Prisma scanner. This effect size is only due to the alterations performed in the experiments and is free of any other source of variability, such as registration error or scanner effects.

## 5. Discussion

### 5.1. Reducing variability across scanners

We have presented a new algorithm based on dictionary learning to harmonize datasets acquired on different scanners using the benchmark database from the CDMRI 2017 harmonization challenge (Tax et al., 2019). The flexibility of the method lies in its ability to adapt the regularization parameter  $\lambda_i$  automatically to each subset of training examples in Eq. (1), ensuring that the relevant information to reconstruct the data is encoded in the dictionary  $\mathbf{D}$ . Only features deemed important to the reconstruction are stored as the  $\ell_1$  norm on the coefficients  $\alpha$  encourages a sparse reconstruction and forces most of the coefficients to zero (Candès et al., 2008; Daubechies et al., 2010; St-Jean et al., 2016). In the reconstruction step, a new value of  $\lambda_i$  is automatically selected for each reconstructed patch, ensuring that the regularization is tuned uniquely so that the reconstruction matches the original patch, but using only features found in the target scanner. This is of course at the cost of additional computations since a least-square problem needs to be solved for each candidate value  $\lambda_i$ , but convex and efficient numerical routines reusing the previous solution as a starting point can be used to alleviate computational issues (Friedman et al., 2010). To the best of our knowledge, this is the first case where an automatic search of the regularization parameter has been used in both stages of the optimization.

For the reconstruction step, we introduced two alternatives to compute  $\lambda_i$  through the AIC or CV using held out parts of the signal. While other choices are possible, such as the Bayesian information criterion (Schwarz, 1978), we chose here the AIC for simplicity and because it is in fact equivalent to leave-one-out CV in the asymptotic limit (Stone, 1977). Cross-validation was done with a classical approach as done in statistics, predicting the signal on parts of the current reconstructed patch as opposed to e.g., reconstructing a completely separate patch with the same value of  $\lambda_i$  as may be done in machine learning. This could explain why the AIC based method performed better than the CV criterion for the anisotropy metrics in the SA protocol since the held out data, which is selected at random for every case, may sometimes unbalance the angular part of the signal because of the subsampling. The AIC would not be affected as it can access the whole data for prediction but instead penalizes reconstructions that do not substantially reduce the mean  $\ell_2$  error and are using too many coefficients—a likely situation of overfitting. This also makes the AIC faster to compute since there is no need to refit the whole model from the beginning unlike the CV.

One major advantage of the harmonization approach we presented is that raw datasets are directly harmonized without the requirement of paired samples during training. In fact, the data was given at random for the training phase and we mixed patches from all subjects and all scanners altogether in the additional experiments we described in Section 3.5, preventing overfitting to a particular scanner in the process. While other harmonization approaches have been developed, most of them require paired samples (Cetin Karayumak et al., 2019; Mirzaalian et al., 2016) or harmonize only the extracted scalar maps from diffusion MRI instead (Alexander et al., 2017; Fortin et al., 2017), limiting their applicability in studies that do not account for these requirements at first in their design. Moreover, it is not clear if the mapping developed for a particular scalar map is in fact similar between metrics as scanner effects may behave differently, e.g., isotropy metrics may be subject to global effects while anisotropy metrics may exhibit orientational bias due to low SNR in some given gradient directions. We also observed in our experiments that the error for the ADC and RISH 0 metrics were similar for most methods while the error was larger for the FA and RISH 2 metrics for the baseline method, which are orientation dependent. This shows that the “optimal” mapping function could likely be task dependent if one wants to harmonize the scalar maps between scanners directly, which could complicate interpretation between studies that are not using a matched number of b-values or gradient orientation.

In the additional experiments, we introduced the idea of creating a neutral “scanner space” instead of mapping the datasets towards a single target scanner. We also harmonized datasets which had been altered towards that common space and shown that the induced effect sizes are preserved while at the same time preserving normal anatomical variability. This approach has the benefit of removing variability attributable to both scanners, instead of trying to force the source scanner to mimic variability which is solely attributable to the target scanner. It is also important to mention here that a good harmonization method should remove unwanted variability due to instrumentation, all the while preserving genuine anatomical

effects as also pointed out previously by Fortin et al. (2017). While this statement may seem obvious, success of harmonization towards a common space is much more difficult to quantify than between scanners since we can not look at difference maps between harmonized datasets anymore. As a thought experiment, a harmonization method that would map all datasets towards a constant value would show no difference between the harmonized datasets themselves, therefore entirely removing all variability. It would however commit very large errors when compared against the original version of those same datasets. From Fig. 7, we see that the harmonized datasets are similar to their original version, but Fig. 8 shows that the CV based algorithm has larger relative differences with the data before harmonization. It is however not obvious if the CV based algorithm is removing too much variability by underfitting the data or if the AIC based method is not removing enough, overfitting the data. Fig. 10 suggests that the CV criterion might underfit the data due to the lower effect size, but this could be due to using only 3 fold CV in our experiments to limit computation time. Results might be improved by using more folds as AIC is an approximation to CV as we have previously mentioned.

### 5.2. Dependence of isotropy and anisotropy metrics on scanning parameters

While it is usually advocated that protocols should use similar scanning parameters as much as possible to ensure reproducibility, this is not always easily feasible depending on the sequences readily available from a given vendor and differences in their implementations. Subtle changes in TE and TR influence the measured signal as shown in Fig. 11 by changing the relative T2 and T1 weighting of the measured diffusion signal, respectively. While dMRI local models are usually applied on a per voxel basis, changes in these weightings will yield different values of the diffusion metrics, which makes comparison between scans more difficult as the weighting depends on the different (and unknown) values of T1 and T2 of each voxel (Brown et al., 2014, Chap. 8). Even if these changes are global for every voxels, matched b-values are not sufficient to ensure that the diffusion time is identical between scans as changes in TE influence diffusion metrics such as increased FA (Qin et al., 2009), but this effect may only manifest itself at either long or very short diffusion times in the human brain (Clark et al., 2001; Kim et al., 2005). Proper care should be taken to match the diffusion time beyond the well-known b-value, which may not always be the case if different sequences are used e.g., PGSE on the Siemens scanners and TRSE on the GE scanner as used in this manuscript. Additional effects due to gradients and b-values spatial distortions (Bammer et al., 2003) could also adversely affect the diffusion metrics, especially on the Connectom scanner as it uses strong gradients of 300 mT/m (Tax et al., 2019). Isotropy metrics are not necessarily free of these confounds as gradients nonlinearity create a spatially dependent error on the b-values (Paquette et al., 2019). This could explain the larger mean error for the CV and baseline methods on the Connectom scanner harmonization task, especially for the anisotropy metrics. While correcting for these effects is not straightforward, gradient timings should be reported in addition to the usual parameters (e.g., TE, TR, b-values and number of gradient directions) in studies to ease subsequent harmonization. Accounting for these differences during analysis could be done e.g., by using a (possibly mono-exponential) model including diffusion time and predicting the diffusion metrics of interest at common scanning parameters values between the acquisitions to harmonize.

### 5.3. Limitations

*Limitations of harmonization.* As Burnham and Anderson (2004) stated, “in a very important sense, we are not trying to model the data; instead, we are trying to model the information in the data”. This is indeed the approach taken in the challenge by the participants, the four other entries relying on deep learning and neural networks for the most part with all methods (including ours) optimizing a loss function which considered the difference between the original and the harmonized dataset. With the rapid rise of the next generation of deep learning methods such as generative adversarial networks (GAN) and extensions (Goodfellow et al., 2014), it is now possible to instead directly model the *distribution* of the data. This allows generation of datasets from a completely different imaging modality such as synthesizing target CT datasets from source MRI datasets (Wolterink et al., 2017). However, if proper care is not taken to represent truthfully the distribution of the data (e.g., not including enough tumor samples in a harmonization task between datasets with pathological data), this can lead to severe issues. Cohen et al. (2018) recently showed that in such

|                       | GE                                                                                | Prisma                                                                            |                                                                                   |                                                                                   | Connectom                                                                          |                                                                                     |                                                                                     |
|-----------------------|-----------------------------------------------------------------------------------|-----------------------------------------------------------------------------------|-----------------------------------------------------------------------------------|-----------------------------------------------------------------------------------|------------------------------------------------------------------------------------|-------------------------------------------------------------------------------------|-------------------------------------------------------------------------------------|
| Standard (ST)         | 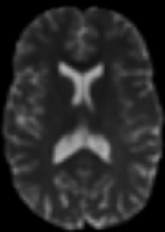 |  |  |  |  |  |  |
| TE/TR (ms)            | 89/CG                                                                             | 89/7200                                                                           | 80/7200                                                                           | 89/13000                                                                          | 89/7200                                                                            | 68/7200                                                                             | 89/13000                                                                            |
| State-of-the-art (SA) |                                                                                   |  |  |  |  |  |  |
| TE/TR (ms)            |                                                                                   | 80/4500                                                                           | 80/7200                                                                           | 89/7200                                                                           | 68/5400                                                                            | 68/7200                                                                             | 89/7200                                                                             |

Figure 11: Example  $b = 0$  s/mm<sup>2</sup> images for the standard protocol (top row) and the state-of-the-art protocol (bottom row) for a single subject acquired on the three scanners at different combinations of TE and TR. Note that the  $b = 0$  s/mm<sup>2</sup> image for the GE scanner was only acquired at a single TE with a cardiac gated (CG) TR. The figure is adapted from [Tax et al. \(2019\)](#), available under the CC-BY 4.0 license.

a case, GAN based methods could try to remove the pathology in the data to match the distribution of healthy subjects that the method previously learned, precluding potential applications to new datasets or pathological cases not represented “well enough” in the training set. The same concept would likely apply to systematic artifacts; if every dataset from a target scanner is corrupted by, e.g., a table vibration artifact, it may very well be possible that a harmonization algorithm will try to imprint this artifact to the source datasets to match the target datasets. The same remark would apply to our harmonization algorithm; if systematic artifacts are in the data, the learned dictionary may very well try to reconstruct this systematic artifacts. However, when rebuilding the source dataset using this corrupted target dictionary, we expect that the artifact would be mitigated since it would not appear in the source dataset and hence should not be reconstructed by [Eq. \(1\)](#) as it would penalize the  $\ell_2$  norm part of the cost function. While offering a promising avenue, care must be taken when analyzing harmonization methods to ensure that they still faithfully represent the data as optimal values of the cost functions themselves or “good” reconstruction of the diffusion metrics only may not ensure this fact ([Rohlfing, 2012](#)).

*Limitations of our algorithm and possible improvements.* Our additional experiments with simulated free water have shown how harmonization can, to a certain extent, account for data abnormalities not part of the training set. However, the presence of CSF and the boundary between gray matter and CSF (or a linear combination of those elements) may yield enough information for the reconstruction to encode these features in the dictionary. This can provide new elements which are not used for the reconstruction of normal white matter but may be useful for the altered data in the experiments. It is not necessarily true that this property would also be valid for other neurological disorders such as tumors, especially if their features are not well represented in the training data as we have mentioned previously in [Section 5.3](#). Another aspect which we did not explicitly cover is multishell data i.e., datasets acquired with multiple b-values, which was in fact part of the following CDMRI challenge ([Ning et al., 2019](#)). Nevertheless, our method can still be used on such datasets, but would not be aware of the relationship between DWIs beyond the angular domain. Other approaches to build the dictionary could be used to inform the algorithm and potentially increase

performance on such datasets by explicitly modeling the spatial and angular relationship (Schwab et al., 2018) or using an adaptive weighting considering the b-values in the angular domain (Duits et al., 2019) amongst other possible strategies. Modeling explicitly the angular part of the signal could also be used to sample new gradients directions directly, an aspect we covered in the original CDMRI challenge by using the spherical harmonics basis (Descoteaux et al., 2007). Correction for the nature of the noise distribution could also be subsequently included as a processing step before harmonization since reconstruction algorithms vary by scanner vendor (Dietrich et al., 2008; St-Jean et al., 2018), leading to differences between scans due to changes in the noise floor level (Sakaie et al., 2018). Improvements could also potentially be achieved by considering the group structure shared by overlapping patches when optimizing Eq. (1) (Simon et al., 2013). While this structure would need to be explicitly specified, optimizing jointly groups of variable has recently led to massive improvements in other applications of diffusion MRI such as reduction of false positive connections in tractography (Schiavi et al., 2019).

## 6. Conclusions

In this paper, we have developed and evaluated a new harmonization algorithm to reduce intra and inter scanner differences. Using the public database from the CDMRI 2017 harmonization challenge, we have shown how a mapping from one scanner to another can be constructed automatically through dictionary learning using unpaired training datasets. This can also be done for different spatial resolutions through careful matching of the spatial patch size used to build the dictionary from the target scanner. We also introduced the concept of mapping datasets towards an arbitrary “scanner space” and used the proposed algorithm to reconstruct altered versions of the test datasets corrupted by a free water compartment, even if such data was not part of the training datasets. Results have shown that the effect size due to alterations is preserved after harmonization, while removing variability attributable to scanner effects. We also provided recommendation when harmonizing protocols, such as reporting the gradient timings to inform subsequent harmonization algorithms which could exploit these values across studies. As perfect matching of scanner parameters is difficult to do in practice due to differences in vendor implementations, an alternative approach could be to account for these differences through models of diffusion using these additional parameters. Nevertheless, as the algorithm is freely available, this could help multicenter studies in pooling their data while removing scanner specific confounds and increase statistical power in the process.

## Appendix A. The harmonization algorithm

This appendix outlines the harmonization algorithm in two separate parts. Algorithm 1 first shows how to build a target dictionary as depicted in the top part of Fig. 1. The bottom part of the diagram shows how to rebuild a dataset given the dictionary and is detailed in Algorithm 2. Our implementation is also freely available at <https://github.com/samuelstjean/harmonization> (St-Jean et al., 2019).



---

**Algorithm 1:** The proposed harmonization algorithm - building a target dictionary.

---

**Data:** Datasets, patch size, angular neighbor

**Result:** Dictionary  $D$

**Step 1 :** *Extracting patches from all datasets;*

**foreach** *Datasets* **do**

    Find the closest angular neighbors;

    Create a 4D block with a  $b = 0$  s/mm<sup>2</sup> image and the angular neighbors;

    Extract all 3D patches and store the result in an array  $\Omega$ ;

**end**

**Step 2 :** *Build the target dictionary;*

**while** *Number of max iterations not reached* **do**

    Randomly pick patches from  $\Omega$ ;

    Solve Eq. (1) for  $\alpha$  with  $D$  fixed;

    Solve Eq. (1) for  $D$  with  $\alpha$  fixed using e.g., Mairal et al. (2010, Algorithm 2);

**end**

---

---

**Algorithm 2:** The proposed harmonization algorithm - reconstruction of the harmonized data.

---

**Data:** Dataset, dictionary

**Result:** Harmonized dataset

**Step 1 :** *Extracting patches from the dataset to harmonize;*

**foreach** *Dataset* **do**

    Find the closest angular neighbors;

    Create a 4D block with a  $b = 0$  s/mm<sup>2</sup> image and the angular neighbors;

    Extract all overlapping 3D patches and store the result as  $\Omega$ ;

**end**

**if** *Matching across spatial resolution* **then**

    Downsample  $D$  into  $D_{\text{small}}$  spatially before reconstruction;

**else**

$D_{\text{small}} = D$ ;

**end**

**Step 2 :** *Find the harmonized patch;*

**foreach** *patches*  $\in \Omega$  **do**

    Find the coefficients  $\alpha$  by solving Eq. (1) for  $D_{\text{small}}$  fixed;

    Find the harmonized representation  $X = D\alpha$ ;

**end**

**foreach** *patches*  $\in \Omega$  **do**

    Put back each patch at its spatial location and average overlapping parts;

**end**

---

## Acknowledgments

Samuel St-Jean was supported by the Fonds de recherche du Québec - Nature et technologies (FRQNT) (Dossier 192865). This research is supported by VIDI Grant 639.072.411 from the Netherlands Organization for Scientific Research (NWO). We would additionally like to thank Chantal Tax for providing us with the evaluation masks and testing datasets from the challenge. The data were acquired at the UK National Facility for In Vivo MR Imaging of Human Tissue Microstructure located in CUBRIC funded by the EPSRC (grant EP/M029778/1), and The Wolfson Foundation. Acquisition and processing of the data was supported by a Rubicon grant from the NWO (680-50-1527), a Wellcome Trust Investigator Award (096646/Z/11/Z), and a Wellcome Trust Strategic Award (104943/Z/14/Z). This database was initiated by the 2017 and 2018 MICCAI Computational Diffusion MRI committees (Chantal Tax, Francesco Grussu, Enrico Kaden, Lipeng Ning, Jelle Veraart, Elisenda Bonet-Carne, and Farshid Sepehrband) and CUBRIC, Cardiff University (Chantal Tax, Derek Jones, Umesh Rudrapatna, John Evans, Greg Parker, Slawomir Kusmia, Cyril Charron, and David Linden). Declarations of interest: none. The funding agencies were not involved in the design, data collection nor interpretation of this study.

## References

- Akaike, H., 1974. A new look at the statistical model identification. *IEEE Transactions on Automatic Control* 19, 716–723. doi:[10.1109/TAC.1974.1100705](https://doi.org/10.1109/TAC.1974.1100705).
- Alexander, D.C., Zikic, D., Ghosh, A., Tanno, R., Wottschel, V., Zhang, J., Kaden, E., Dyrby, T.B., Sotiropoulos, S.N., Zhang, H., Criminisi, A., 2017. Image quality transfer and applications in diffusion MRI. *NeuroImage* 152, 283–298. doi:[10.1016/j.neuroimage.2017.02.089](https://doi.org/10.1016/j.neuroimage.2017.02.089).
- Assemlal, H.E., Tschumperlé, D., Brun, L., Siddiqi, K., 2011. Recent advances in diffusion MRI modeling: Angular and radial reconstruction. *Medical image analysis* 15, 369–96. doi:[10.1016/j.media.2011.02.002](https://doi.org/10.1016/j.media.2011.02.002).
- Bammer, R., Markl, M., Barnett, A., Acar, B., Alley, M., Pelc, N., Glover, G., Moseley, M., 2003. Analysis and generalized correction of the effect of spatial gradient field distortions in diffusion-weighted imaging. *Magnetic Resonance in Medicine* 50, 560–569. doi:[10.1002/mrm.10545](https://doi.org/10.1002/mrm.10545).
- Basser, P.J., Mattiello, J., LeBihan, D., 1994. MR diffusion tensor spectroscopy and imaging. *Biophysical journal* 66, 259–67. doi:[10.1016/S0006-3495\(94\)80775-1](https://doi.org/10.1016/S0006-3495(94)80775-1).
- Basser, P.J., Pierpaoli, C., 1996. Microstructural and Physiological Features of Tissues Elucidated by Quantitative-Diffusion-Tensor MRI. *Journal of Magnetic Resonance, Series B* 111, 209–219. doi:[10.1006/jmrb.1996.0086](https://doi.org/10.1006/jmrb.1996.0086).
- Benjamini, Y., Hochberg, Y., 1995. Controlling the false discovery rate: a practical and powerful approach to multiple testing. *Journal of the Royal Statistical Society* 57, 289–300. doi:[10.2307/2346101](https://doi.org/10.2307/2346101).
- Brown, R.W., Haacke, E.M., Cheng, Y.C.N., Thompson, M.R., Venkatesan, R., 2014. *Magnetic resonance imaging: physical principles and sequence design*. John Wiley & Sons.
- Burnham, K.P., Anderson, D.R., 2004. Multimodel Inference. *Sociological Methods & Research* 33, 261–304. doi:[10.1177/0049124104268644](https://doi.org/10.1177/0049124104268644).
- Candès, E.J., Wakin, M.B., Boyd, S.P., 2008. Enhancing Sparsity by Reweighted l1 Minimization. *Journal of Fourier Analysis and Applications* 14, 877–905. doi:[10.1007/s00041-008-9045-x](https://doi.org/10.1007/s00041-008-9045-x).
- Cetin Karayumak, S., Bouix, S., Ning, L., James, A., Crow, T., Shenton, M., Kubicki, M., Rath, Y., 2019. Retrospective harmonization of multi-site diffusion MRI data acquired with different acquisition parameters. *NeuroImage* 184, 180–200. doi:[10.1016/j.neuroimage.2018.08.073](https://doi.org/10.1016/j.neuroimage.2018.08.073).
- Clark, C.A., Hedehus, M., Moseley, M.E., 2001. Diffusion time dependence of the apparent diffusion tensor in healthy human brain and white matter disease. *Magnetic Resonance in Medicine* 45, 1126–1129. doi:[10.1002/mrm.1149](https://doi.org/10.1002/mrm.1149).
- Cohen, J.P., Luck, M., Honari, S., 2018. Distribution Matching Losses Can Hallucinate Features in Medical Image Translation, in: *Medical Image Computing and Computer Assisted Intervention – MICCAI 2018*. Springer International Publishing, volume 57, pp. 529–536. doi:[10.1007/978-3-030-00928-1\\_60](https://doi.org/10.1007/978-3-030-00928-1_60).
- Daubechies, I., Devore, R., Fornasier, M., Güntürk, C.S., 2010. Iteratively reweighted least squares minimization for sparse recovery. *Communications on Pure and Applied Mathematics* 63, 1–38. doi:[10.1002/cpa.20303](https://doi.org/10.1002/cpa.20303).
- De Luca, A., Franklin, S., Lucci, C., Hendrikse, J., Froeling, M., Leemans, A., 2019. Investigation of the dependence of free water and pseudo-diffusion MRI estimates on the cardiac cycle, in: *International Society for Magnetic Resonance in Medicine (ISMRM)*, p. 344.
- Descoteaux, M., Angelino, E., Fitzgibbons, S., Deriche, R., 2007. Regularized, fast, and robust analytical Q-ball imaging. *Magnetic Resonance in Medicine* 58, 497–510. doi:[10.1002/mrm.21277](https://doi.org/10.1002/mrm.21277).
- Dietrich, O., Raya, J.G., Reeder, S.B., Ingrisch, M., Reiser, M.F., Schoenberg, S.O., 2008. Influence of multichannel combination, parallel imaging and other reconstruction techniques on MRI noise characteristics. *Magnetic resonance imaging* 26, 754–62. doi:[10.1016/j.mri.2008.02.001](https://doi.org/10.1016/j.mri.2008.02.001).
- Duchesne, S., Chouinard, I., Potvin, O., Fonov, V.S., Khademi, A., Bartha, R., Bellec, P., Collins, D.L., Descoteaux, M., Hoge, R., McCreary, C.R., Ramirez, J., Scott, C.J., Smith, E.E., Strother, S.C., Black, S.E., 2019. The Canadian Dementia Imaging Protocol: Harmonizing National Cohorts. *Journal of Magnetic Resonance Imaging* 49, 456–465. doi:[10.1002/jmri.26197](https://doi.org/10.1002/jmri.26197).

- Duits, R., St-Onge, E., Portegies, J., Smets, B., 2019. Total Variation and Mean Curvature PDEs on the Space of Positions and Orientations, in: Bruckstein, A.M., ter Haar Romeny, B.M., Bronstein, A.M., Bronstein, M.M. (Eds.), *Lecture Notes in Computer Science*. Springer Berlin Heidelberg, Berlin, Heidelberg. volume 11603 of *Lecture Notes in Computer Science*, pp. 211–223. doi:10.1007/978-3-030-22368-7\_17.
- Elad, M., Aharon, M., 2006. Image Denoising Via Sparse and Redundant Representations Over Learned Dictionaries. *IEEE Transactions on Image Processing* 15, 3736–3745. doi:10.1109/TIP.2006.881969.
- Federau, C., Hagmann, P., Maeder, P., Müller, M., Meuli, R., Stuber, M., O'Brien, K., 2013. Dependence of Brain Intravoxel Incoherent Motion Perfusion Parameters on the Cardiac Cycle. *PLoS ONE* 8, e72856. doi:10.1371/journal.pone.0072856.
- Feinberg, D.a., Moeller, S., Smith, S.M., Auerbach, E., Ramanna, S., Glasser, M.F., Miller, K.L., Uğurbil, K., Yacoub, E., 2010. Multiplexed echo planar imaging for sub-second whole brain fmri and fast diffusion imaging. *PLoS ONE* 5. doi:10.1371/journal.pone.0015710.
- Fortin, J.P., Parker, D., Tunç, B., Watanabe, T., Elliott, M.A., Ruparel, K., Roalf, D.R., Satterthwaite, T.D., Gur, R.C., Gur, R.E., Schultz, R.T., Verma, R., Shinohara, R.T., 2017. Harmonization of multi-site diffusion tensor imaging data. *NeuroImage* 161, 149–170. doi:10.1016/j.neuroimage.2017.08.047.
- Friedman, J., Hastie, T., Tibshirani, R., 2010. Regularization Paths for Generalized Linear Models via Coordinate Descent. *Journal of statistical software* 33, 1–22.
- Goodfellow, I.J., Pouget-Abadie, J., Mirza, M., Xu, B., Warde-Farley, D., Ozair, S., Courville, A., Bengio, Y., 2014. Generative Adversarial Networks, in: *Proceedings of the International Conference on Neural Information Processing Systems (NIPS 2014)*, pp. 2672–2680.
- Gramfort, A., Poupon, C., Descoteaux, M., 2014. Denoising and fast diffusion imaging with physically constrained sparse dictionary learning. *Medical image analysis* 18, 36–49. doi:10.1016/j.media.2013.08.006.
- Gronenschild, E.H.B.M., Habets, P., Jacobs, H.I.L., Mengelers, R., Rozendaal, N., van Os, J., Marcelis, M., 2012. The Effects of FreeSurfer Version, Workstation Type, and Macintosh Operating System Version on Anatomical Volume and Cortical Thickness Measurements. *PLoS ONE* 7, e38234. doi:10.1371/journal.pone.0038234.
- Hedges, L.V., 1981. Distribution Theory for Glass's Estimator of Effect size and Related Estimators. *Journal of Educational Statistics* 6, 107–128. doi:10.3102/10769986006002107.
- Hofman, A., Brusselle, G.G.O., Murad, S.D., van Duijn, C.M., Franco, O.H., Goedegebure, A., Ikram, M.A., Klaver, C.C.W., Nijsten, T.E.C., Peeters, R.P., Stricker, B.H.C., Tiemeier, H.W., Uitterlinden, A.G., Vernooij, M.W., 2015. The Rotterdam Study: 2016 objectives and design update. *European Journal of Epidemiology* 30, 661–708. doi:10.1007/s10654-015-0082-x.
- Hofman, A., Grobbee, D.E., De Jong, P.T.V.M., Van den Ouweland, F.A., 1991. Determinants of disease and disability in the elderly: The Rotterdam elderly study. *European Journal of Epidemiology* 7, 403–422. doi:10.1007/BF00145007.
- Huisman, T.A.G.M., Loenneker, T., Barta, G., Bellemann, M.E., Hennig, J., Fischer, J.E., Il'yasov, K.A., 2006. Quantitative diffusion tensor MR imaging of the brain: field strength related variance of apparent diffusion coefficient (ADC) and fractional anisotropy (FA) scalars. *European Radiology* 16, 1651–1658. doi:10.1007/s00330-006-0175-8.
- Johansen-Berg, H., Behrens, T.E.J., 2009. *Diffusion MRI*. Elsevier. doi:10.1016/B978-0-12-374709-9.X0001-6.
- Jones, D.K., 2011. *Diffusion MRI: Theory, Methods, and Applications*. Cambridge University Press, Cambridge.
- Kim, S., Chi-Fishman, G., Barnett, A.S., Pierpaoli, C., 2005. Dependence on diffusion time of apparent diffusion tensor of ex vivo calf tongue and heart. *Magnetic Resonance in Medicine* 54, 1387–1396. doi:10.1002/mrm.20676.
- Kristo, G., Leemans, A., Raemaekers, M., Rutten, G.J., de Gelder, B., Ramsey, N.F., 2013. Reliability of two clinically relevant fiber pathways reconstructed with constrained spherical deconvolution. *Magnetic Resonance in Medicine* 70, 1544–1556. doi:10.1002/mrm.24602.
- Kullback, S., Leibler, R.A., 1951. On Information and Sufficiency. *The Annals of Mathematical Statistics* 22, 79–86. doi:10.1214/aoms/1177729694.
- Lakens, D., 2013. Calculating and reporting effect sizes to facilitate cumulative science: a practical primer for t-tests and ANOVAs. *Frontiers in Psychology* 4, 1–12. doi:10.3389/fpsyg.2013.00863.
- Larkman, D.J., Hajnal, J.V., Herlihy, A.H., Coutts, G.A., Young, I.R., Ehnholm, G., 2001. Use of multicoil arrays for separation of signal from multiple slices simultaneously excited. *Journal of Magnetic Resonance Imaging* 13, 313–317. doi:10.1002/1522-2586(200102)13:2<313::AID-JMRI1045>3.0.CO;2-W.
- Lustig, M., Donoho, D., Pauly, J.M., 2007. Sparse MRI: The application of compressed sensing for rapid MR imaging. *Magnetic Resonance in Medicine* 58, 1182–1195. doi:10.1002/mrm.21391.
- Magnotta, V.A., Matsui, J.T., Liu, D., Johnson, H.J., Long, J.D., Bolster, B.D., Mueller, B.A., Lim, K., Mori, S., Helmer, K.G., Turner, J.A., Reading, S., Lowe, M.J., Aylward, E., Flashman, L.A., Bonett, G., Paulsen, J.S., 2012. MultiCenter Reliability of Diffusion Tensor Imaging. *Brain Connectivity* 2, 345–355. doi:10.1089/brain.2012.0112.
- Mairal, J., Bach, F., Ponce, J., Sapiro, G., 2010. Online Learning for Matrix Factorization and Sparse Coding. *Journal of Machine Learning Research* 11, 19–60.
- Mairal, J., Bach, F., Ponce, J., Sapiro, G., Zisserman, A., 2009. Non-local sparse models for image restoration, in: *2009 IEEE 12th International Conference on Computer Vision, IEEE*. pp. 2272–2279. doi:10.1109/ICCV.2009.5459452.
- Merlet, S., Caruyer, E., Ghosh, A., Deriche, R., 2013. A computational diffusion MRI and parametric dictionary learning framework for modeling the diffusion signal and its features. *Medical Image Analysis* 17, 843–830. doi:10.1016/j.media.2013.04.011.
- Mirzaalian, H., Ning, L., Savadjiev, P., Pasternak, O., Bouix, S., Michailovich, O., Grant, G., Marx, C., Morey, R., Flashman, L., George, M., McAllister, T., Andaluz, N., Shutter, L., Coimbra, R., Zafonte, R., Coleman, M., Kubicki, M., Westin, C., Stein, M., Shenton, M., Rathi, Y., 2016. Inter-site and inter-scanner diffusion MRI data harmonization. *NeuroImage* 135, 311–323. doi:10.1016/j.neuroimage.2016.04.041.
- Ning, L., Bonet-Carne, E., Grussu, F., Sepelband, F., Kaden, E., Veraart, J., Blumberg, S.B., Khoo, C.S., Palombo, M., Coll-

- Font, J., Scherrer, B., Warfield, S.K., Karayumak, S.C., Rathi, Y., Koppers, S., Weninger, L., Ebert, J., Merhof, D., Moyer, D., Pietsch, M., Christiaens, D., Teixeira, R., Tournier, J.D., Zhylka, A., Pluim, J., Parker, G., Rudrapatna, U., Evans, J., Charron, C., Jones, D.K., Tax, C.W.M., 2019. Muli-shell Diffusion MRI Harmonisation and Enhancement Challenge (MUSHAC): Progress and Results, Springer International Publishing, Cham. Mathematics and Visualization, pp. 217–224. doi:[10.1007/978-3-030-05831-9\\_18](https://doi.org/10.1007/978-3-030-05831-9_18).
- Paquette, M., Eichner, C., Anwender, A., 2019. Gradient Non-Linearity Correction for Spherical Mean Diffusion Imaging, in: International Symposium on Magnetic Resonance in Medicine (ISMRM'19), p. 550.
- Pasternak, O., Sochen, N., Gur, Y., Intrator, N., Assaf, Y., 2009. Free water elimination and mapping from diffusion MRI. *Magnetic Resonance in Medicine* 62, 717–730. doi:[10.1002/mrm.22055](https://doi.org/10.1002/mrm.22055).
- Pierpaoli, C., Jones, D.K., 2004. Removing CSF Contamination in Brain DT-MRIs by Using a Two-Compartment Tensor Model, in: Proceedings of the 12th Annual Meeting of ISMRM, Kyoto, p. 1215.
- Pohl, K.M., Sullivan, E.V., Rohlfing, T., Chu, W., Kwon, D., Nichols, B.N., Zhang, Y., Brown, S.A., Tapert, S.F., Cummins, K., Thompson, W.K., Brumback, T., Colrain, I.M., Baker, F.C., Prouty, D., De Bellis, M.D., Voyvodic, J.T., Clark, D.B., Schirda, C., Nagel, B.J., Pfefferbaum, A., 2016. Harmonizing DTI measurements across scanners to examine the development of white matter microstructure in 803 adolescents of the NCANDA study. *NeuroImage* 130, 194–213. doi:[10.1016/j.neuroimage.2016.01.061](https://doi.org/10.1016/j.neuroimage.2016.01.061).
- Qin, W., Shui Yu, C., Zhang, F., Du, X.Y., Jiang, H., Xia Yan, Y., Cheng Li, K., 2009. Effects of echo time on diffusion quantification of brain white matter at 1.5T and 3.0T. *Magnetic Resonance in Medicine* 61, 755–760. doi:[10.1002/mrm.21920](https://doi.org/10.1002/mrm.21920).
- Rohlfing, T., 2012. Image similarity and tissue overlaps as surrogates for image registration accuracy: Widely used but unreliable. *IEEE Transactions on Medical Imaging* 31, 153–163. doi:[10.1109/TMI.2011.2163944](https://doi.org/10.1109/TMI.2011.2163944).
- Rueda, A., Malpica, N., Romero, E., 2013. Single-image super-resolution of brain MR images using overcomplete dictionaries. *Medical Image Analysis* 17, 113–132. doi:[10.1016/j.media.2012.09.003](https://doi.org/10.1016/j.media.2012.09.003).
- Sakaie, K., Zhou, X., Lin, J., Debbs, J., Lowe, M., Fox, R.J., 2018. Technical Note: Retrospective reduction in systematic differences across scanner changes by accounting for noise floor effects in diffusion tensor imaging. *Medical Physics* 45, 4171–4178. doi:[10.1002/mp.13088](https://doi.org/10.1002/mp.13088).
- Schiavi, S., Barakovic, M., Pineda, M.O., Descoteaux, M., Thiran, J.P., Daducci, A., 2019. Reducing false positives in tractography with microstructural and anatomical priors. bioRxiv doi:[10.1101/608349](https://doi.org/10.1101/608349).
- Schwab, E., Vidal, R., Charon, N., 2018. Joint spatial-angular sparse coding for dMRI with separable dictionaries. *Medical Image Analysis* 48, 25–42. doi:[10.1016/j.media.2018.05.002](https://doi.org/10.1016/j.media.2018.05.002).
- Schwarz, G., 1978. Estimating the dimension of a model. *The Annals of Statistics* 6, 461–464. doi:[10.1214/aos/1176344136](https://doi.org/10.1214/aos/1176344136).
- Simon, N., Friedman, J., Hastie, T., Tibshirani, R., 2013. A Sparse-Group Lasso. *Journal of Computational and Graphical Statistics* 22, 231–245. doi:[10.1080/10618600.2012.681250](https://doi.org/10.1080/10618600.2012.681250).
- St-Jean, S., Coupé, P., Descoteaux, M., 2016. Non Local Spatial and Angular Matching: Enabling higher spatial resolution diffusion MRI datasets through adaptive denoising. *Medical Image Analysis* 32, 115–130. doi:[10.1016/j.media.2016.02.010](https://doi.org/10.1016/j.media.2016.02.010).
- St-Jean, S., De Luca, A., Viergever, M.A., Leemans, A., 2018. Automatic, Fast and Robust Characterization of Noise Distributions for Diffusion MRI, in: Frangi, A.F., Schnabel, J.A., Davatzikos, C., Alberola-López, C., Fichtinger, G. (Eds.), *Medical Image Computing and Computer Assisted Intervention – MICCAI 2018*. Springer International Publishing, pp. 304–312. doi:[10.1007/978-3-030-00928-1\\_35](https://doi.org/10.1007/978-3-030-00928-1_35).
- St-Jean, S., Viergever, M.A., Leemans, A., 2017. A unified framework for upsampling and denoising of diffusion MRI data. 25th Annual Meeting of ISMRM , 3533.
- St-Jean, S., Viergever, M.A., Leemans, A., 2019. samuelstjean/harmonization: Harmonization of diffusion MRI datasets with adaptive dictionary learning. doi:[10.5281/zenodo.3385925](https://doi.org/10.5281/zenodo.3385925).
- Stone, M., 1977. An Asymptotic Equivalence of Choice of Model by Cross-Validation and Akaike's Criterion. *Journal of the Royal Statistical Society: Series B (Methodological)* 39, 44–47. doi:[10.1111/j.2517-6161.1977.tb01603.x](https://doi.org/10.1111/j.2517-6161.1977.tb01603.x).
- Student, 1908. The Probable Error of a Mean. *Biometrika* 6, 1–25.
- Tax, C.M.W., Grussu, F., Kaden, E., Ning, L., Rudrapatna, U., John Evans, C., St-Jean, S., Leemans, A., Koppers, S., Merhof, D., Ghosh, A., Tanno, R., Alexander, D.C., Zappalà, S., Charron, C., Kusmia, S., Linden, D.E., Jones, D.K., Veraart, J., 2019. Cross-scanner and cross-protocol diffusion MRI data harmonisation: A benchmark database and evaluation of algorithms. *NeuroImage* 195, 285–299. doi:[10.1016/j.neuroimage.2019.01.077](https://doi.org/10.1016/j.neuroimage.2019.01.077).
- Tibshirani, R.J., Taylor, J., 2012. Degrees of freedom in lasso problems. *The Annals of Statistics* 40, 1198–1232. doi:[10.1214/12-AOS1003](https://doi.org/10.1214/12-AOS1003).
- Tournier, J.D., 2019. Diffusion MRI in the brain – Theory and concepts. *Progress in Nuclear Magnetic Resonance Spectroscopy* 112–113, 1–16. doi:[10.1016/j.pnmrs.2019.03.001](https://doi.org/10.1016/j.pnmrs.2019.03.001).
- Tournier, J.D., Mori, S., Leemans, A., 2011. Diffusion tensor imaging and beyond. *Magnetic Resonance in Medicine* 65, 1532–1556. doi:[10.1002/mrm.22924](https://doi.org/10.1002/mrm.22924).
- Vemuri, B.C., Sun, J., Banerjee, M., Pan, Z., Turner, S.M., Fuller, D.D., Forder, J., Entezari, A., 2019. A Geometric Framework for Ensemble Average Propagator Reconstruction from Diffusion MRI. *Medical Image Analysis* doi:[10.1016/j.media.2019.06.012](https://doi.org/10.1016/j.media.2019.06.012).
- Vollmar, C., O'Muircheartaigh, J., Barker, G.J., Symms, M.R., Thompson, P., Kumari, V., Duncan, J.S., Richardson, M.P., Koeppe, M.J., 2010. Identical, but not the same: Intra-site and inter-site reproducibility of fractional anisotropy measures on two 3.0 T scanners. *NeuroImage* 51, 1384–1394. doi:[10.1016/j.neuroimage.2010.03.046](https://doi.org/10.1016/j.neuroimage.2010.03.046).
- Wolterink, J.M., Dinkla, A.M., Savenije, M.H.F., Seevinck, P.R., van den Berg, C.A.T., Išgum, I., 2017. Deep MR to CT Synthesis Using Unpaired Data, in: *Lecture Notes in Computer Science*. volume 10557 LNCS, pp. 14–23. doi:[10.1007/978-3-319-68127-6\\_2](https://doi.org/10.1007/978-3-319-68127-6_2).
- Yang, J., Wang, Z., Lin, Z., Cohen, S., Huang, T., 2012. Coupled Dictionary Training for Image Super-Resolution. *IEEE*

- Transactions on Image Processing 21, 3467–3478. doi:[10.1109/TIP.2012.2192127](https://doi.org/10.1109/TIP.2012.2192127).
- Yang, J., Wright, J., Huang, T., Ma, Y., 2010. Image Super-Resolution Via Sparse Representation. IEEE Transactions on Image Processing 19, 2861–2873. doi:[10.1109/TIP.2010.2050625](https://doi.org/10.1109/TIP.2010.2050625).
- Zhu, A.H., Moyer, D.C., Nir, T.M., Thompson, P.M., Jahanshad, N., 2019. Challenges and Opportunities in dMRI Data Harmonization, in: Kaden, E., Grussu, F., Ning, L., Tax, C.M.W., Veraart, J. (Eds.), Computational Diffusion MRI MICCAI 2019. Springer International Publishing, Cham. Mathematics and Visualization, pp. 157–172. doi:[10.1007/978-3-030-05831-9\\_13](https://doi.org/10.1007/978-3-030-05831-9_13).
- Zou, H., Hastie, T., Tibshirani, R., 2007. On the “degrees of freedom” of the lasso. The Annals of Statistics 35, 2173–2192. doi:[10.1214/009053607000000127](https://doi.org/10.1214/009053607000000127).
